# Supplementary material for: Comparative analyses of lipidomes and transcriptomes reveal a concerted action of multiple defensive systems against photooxidative stress in Haematococcus pluvialis
Source: PubMed Central journal article supplement (PMC4112636; doi:10.1093/jxb/eru206), 2014-05-12
Supplement: supp_eru206_jexbot119974_file001.pdf [file supp_eru206_jexbot119974_file001.pdf]

**Comparative analyses of lipidomes and transcriptomes reveal a concerted action of multiple defensive systems against photooxidative stress in *Haematococcus pluvialis***

**Yunho Gwak<sup>1+</sup>, Yong-sic Hwang<sup>2+</sup>, Baobei Wang<sup>3</sup>, Minju Kim<sup>1</sup>, Jooyeon Jeong<sup>1</sup>, Choul-Gyun Lee<sup>4</sup>, Qiang Hu<sup>5</sup>, Danxiang Han<sup>3\*</sup> and EonSeon Jin<sup>1\*</sup>**

<sup>1</sup>Department of Life Science, Research Institute for Natural Science, Hanyang University, Seoul, 133-791, South Korea

<sup>2</sup>Department of Bioscience and Biotechnology, Konkuk University, Seoul, 143-701, South Korea

<sup>3</sup>College of Technology and Innovation, Arizona State University, Mesa, Arizona 85212, USA

<sup>4</sup>Department of Biotechnology, Institute of Industrial Biotechnology, Inha University, Incheon, 402-751, South Korea

<sup>5</sup>Center for Microalgal Biotechnology and Biofuels, Institute of Hydrobiology, Chinese Academy of Sciences, Wuhan, Hubei 430072, China

+Both authors contributed equally to this work

**\* Corresponding authors:**

**EonSeon Jin: Tel: +82-2-2220-2561; fax: 82-2-2299-2561; e-mail: esjin@hanyang.ac.kr**

**Danxiang Han: Tel: +1-480-727-5661; email: Danxiang.Han@asu.edu**

## Supplementary data

### Supplementary tables

Table S1-1. Abbreviations and their full names which are used in this paper.

| Abbreviations | Full name                                               |
|---------------|---------------------------------------------------------|
| ACAT          | Acetyl-CoA C-acetyltransferase                          |
| ACCase        | Acetyl-CoA carboxylase                                  |
| ACP           | Acyl carrier protein                                    |
| ACS           | Acyl CoA synthetase                                     |
| APX           | Ascorbate peroxidase                                    |
| BKT           | $\beta$ -carotene ketolase                              |
| CAT           | Catalase                                                |
| CHY           | $\beta$ -carotene hydroxylase                           |
| DAG           | Diacylglycerol                                          |
| DGAT          | Diacylglycerol acyltransferase                          |
| DGDG          | Digalactosyldiacylglycerol                              |
| DGTA          | Diacylglycerol transacylase                             |
| DGTS          | Diacylglyceryltrimethylhomo-Ser                         |
| DHAR          | Dehydroascorbate reductase                              |
| DMAPP         | Dimethylallyl diphosphate                               |
| DXR           | 1-deoxy-D-xylulose 5-phosphate reductoisomerase         |
| DXS           | 1-deoxy-D-xylulose-5-phosphate synthase                 |
| ENR           | Enoyl-AC reductase                                      |
| FAT           | Acyl-ACP thioesterase                                   |
| FPPS          | Farnesyl diphosphate synthase                           |
| G3P           | Glycerol-3-phosphate                                    |
| GGPP          | Geranylgeranyl pyrophosphate                            |
| GGPS          | Geranylgeranyl diphosphate synthase                     |
| GK            | Glycerol kinase                                         |
| GO            | Gene ontology                                           |
| GPAT          | G3P acyltransferase                                     |
| GPX           | Glutathione peroxidase                                  |
| GR            | Glutathione reductase                                   |
| GSH           | Glutathione                                             |
| HD            | 3-hydroxyacyl-ACP dehydratase                           |
| HDR           | 4-hydroxy-3-methylbut-2-enyl diphosphate reductase      |
| HDS           | 1-hydroxy-2-methyl-2-(E)-butenyl-4-diphosphate synthase |
| HMGS          | Hydroxymethylglutaryl-CoA                               |
| HPLC          | High-performance liquid chromatography                  |

Table S1-2. Abbreviations and their full names which are used in this paper.

| <b>Abbreviations</b> | <b>Full name</b>                            |
|----------------------|---------------------------------------------|
| IPP                  | Isopentenyl diphosphate                     |
| IPPI                 | Isopentenyl diphosphate isomerase           |
| KAR                  | 3-ketoacyl-ACP-reductase                    |
| KAS                  | 3-ketoacyl-ACP-synthase                     |
| KEGG                 | Kyoto encyclopedia of genes and genomes     |
| KO                   | KEGG orthology                              |
| LPA                  | Lyso-phosphatidic acid                      |
| LPAAT                | LPA acyltransferase                         |
| MCAT                 | Malonyl-CoA:ACP transacylase                |
| MDHAR                | Monodehydroascorbate reductase              |
| MEP pathway          | 2-C-methyl-D-erythritol 4-phosphate pathway |
| MGDG                 | Monogalactosyldiacylglycerol                |
| MVA pathway          | Mevalonate pathway                          |
| NGS                  | Next generation sequencing                  |
| PA                   | Phosphatidic acid                           |
| PAP                  | Phosphatidic acid phosphatase               |
| PC                   | Phosphatidylcholine                         |
| PDAT                 | Phospholipid:DAG acyltransferase            |
| PDS                  | Phytoene desaturase                         |
| PE                   | Phosphatidylethanolamine                    |
| PETC                 | Photosynthetic electron transport chain     |
| PG                   | Phosphatidylglycerol                        |
| PI                   | Phosphatidylinositol                        |
| PL                   | Phospholipid                                |
| PQ                   | Plastoquinone                               |
| PSY                  | Phytoene synthase                           |
| PTOX                 | Plastid terminal oxidase                    |
| ROS                  | Reactive oxygen species                     |
| SACPD                | Stearoyl-ACP desaturase                     |
| SOD                  | Superoxide dismutase                        |
| SQDG                 | Sulfoquinovosyl diacylglycerol              |
| TAG                  | Triacylglycerols                            |
| TXN                  | Tioredoxin                                  |

Table S2. Total carotenoid and chlorophyll content at the different culture conditions.

|                                      | Cell density<br>(cells·mL <sup>-1</sup> ) | Total carotenoid<br>(µg·mL <sup>-1</sup> ) | Total chlorophyll<br>(µg·mL <sup>-1</sup> ) |
|--------------------------------------|-------------------------------------------|--------------------------------------------|---------------------------------------------|
| Initial stage of cells               | 0.27 x 10 <sup>5</sup> ± 0.34             | 0.02 ± 0.01                                | 0.10 ± 0.01                                 |
| Macrozooids (late exponential stage) | 2.23 x 10 <sup>5</sup> ± 1.26             | 1.50 ± 0.02                                | 2.32 ± 0.01                                 |
| Haematosysts (2 days after HL)       | 2.40 x 10 <sup>5</sup> ± 0.83             | 6.22 ± 0.01                                | 1.60 ± 0.03                                 |
| Haematocysts (4 days after HL)       | 2.51 x 10 <sup>5</sup> ± 0.45             | 9.54 ± 0.03                                | 1.48 ± 0.02                                 |

Table S3-1. Housekeeping genes in the *H. pluvialis* transcriptome.

| Isogroup      | Isotig number                                                                                                                                                                                                                                                                                                                           | Description                                                                                                 | Accession      | Read ratio (Red/Green) |
|---------------|-----------------------------------------------------------------------------------------------------------------------------------------------------------------------------------------------------------------------------------------------------------------------------------------------------------------------------------------|-------------------------------------------------------------------------------------------------------------|----------------|------------------------|
| isogroup00137 | isotig03365-03400                                                                                                                                                                                                                                                                                                                       | AF416462_1 actin-like protein [ <i>Chlamydomonas moewusii</i> ]                                             | AAQ03597.1     | 1.13                   |
| isogroup00180 | isotig03929-03930                                                                                                                                                                                                                                                                                                                       | Actin/actin-like protein [ <i>Coccomyxa subellipsoidea</i> C-169]                                           | EIE26065.1     | 1.21                   |
| isogroup00180 | isotig03933-03936                                                                                                                                                                                                                                                                                                                       | actin-related protein Arp6 [ <i>Volvox carteri f. nagariensis</i> ]                                         | XP_002953065.1 | 1.28                   |
| isogroup01235 | isotig10021-10023                                                                                                                                                                                                                                                                                                                       | actin [ <i>Chlamydomonas reinhardtii</i> ]                                                                  | XP_001699068.1 | 1.44                   |
| isogroup02007 | isotig12785-12787                                                                                                                                                                                                                                                                                                                       | actin [ <i>Chlamydomonas reinhardtii</i> ]                                                                  | XP_001699068.1 | 1.84                   |
| isogroup02158 | isotig13238-13240                                                                                                                                                                                                                                                                                                                       | actin-related protein [ <i>Chlamydomonas reinhardtii</i> ]                                                  | XP_001692106.1 | 1.07                   |
| isogroup03128 | isotig15576-15577                                                                                                                                                                                                                                                                                                                       | actin-related protein Arp3 [ <i>Volvox carteri f. nagariensis</i> ]                                         | XP_002949421.1 | 0.76                   |
| isogroup05043 | isogroup05043                                                                                                                                                                                                                                                                                                                           | actin-related protein [ <i>Chlamydomonas reinhardtii</i> ]                                                  | XP_001694089.1 | 4.75                   |
| isogroup05588 | isotig20464                                                                                                                                                                                                                                                                                                                             | actin II [ <i>Tetrotrochidium matiense</i> ]                                                                | AAM77135.1     | 1.58                   |
| isogroup06946 | isotig23179                                                                                                                                                                                                                                                                                                                             | Actin/actin-like protein [ <i>Coccomyxa subellipsoidea</i> C-169]                                           | EIE26065.1     | 1.58                   |
| isogroup06946 | isotig23180                                                                                                                                                                                                                                                                                                                             | actin-related protein Arp6 [ <i>Volvox carteri f. nagariensis</i> ]                                         | XP_002953065.1 | 1.58                   |
| isogroup12428 | isotig29040                                                                                                                                                                                                                                                                                                                             | actin-related protein ArpC4 [ <i>Volvox carteri f. nagariensis</i> ]                                        | XP_002945817.1 | 2.06                   |
| isogroup14906 | isotig31518                                                                                                                                                                                                                                                                                                                             | AF416462_1 actin-like protein [ <i>Chlamydomonas moewusii</i> ]                                             | AAQ03597.1     | 2.85                   |
| isogroup00052 | isotig01636-01684                                                                                                                                                                                                                                                                                                                       | alpha-tubulin [ <i>Haematococcus pluvialis</i> ]                                                            | AAX63396.1     | 0.60                   |
| isogroup00056 | isotig01833-01844                                                                                                                                                                                                                                                                                                                       | beta tubulin [ <i>Chlamydomonas incerta</i> ]                                                               | O04386.1       | 0.62                   |
| isogroup00056 | isotig01845-01856,<br>isotig02116, 02117,                                                                                                                                                                                                                                                                                               | beta tubulin [ <i>Volvox carteri f. nagariensis</i> ]                                                       | XP_002953617.1 | 0.66                   |
| isogroup00066 | 02130, 02132, 02141,<br>02141, 02141, 02146,<br>02148,<br>02150, 02151<br>isotig02111, 02113,<br>02119, 02121, 02123,<br>02127, 02129,<br>02134, 02136, 02139<br>isotig02112, 02114,<br>02115, 02118, 02120,<br>02122, 02124-02126,<br>02128, 02131, 02133,<br>02135, 02137, 02138,<br>02140, 02143-02145,<br>02147, 02149, 02152-02155 | beta tubulin [ <i>Chlamydomonas incerta</i> ]                                                               | O04386.1       | 0.54                   |
| isogroup00066 | 123, 02127, 02129,<br>02134, 02136, 02139<br>isotig02112, 02114,<br>02115, 02118, 02120,<br>02122, 02124-02126,<br>02128, 02131, 02133,<br>02135, 02137, 02138,<br>02140, 02143-02145,<br>02147, 02149, 02152-02155                                                                                                                     | beta tubulin [ <i>Volvox carteri f. nagariensis</i> ]                                                       | XP_002953617.1 | 0.56                   |
| isogroup00066 | 02128, 02131, 02133,<br>02135, 02137, 02138,<br>02140, 02143-02145,<br>02147, 02149, 02152-02155                                                                                                                                                                                                                                        | tubulin beta chain [ <i>Cryptosporidium parvum Iowa II</i> ]                                                | XP_627803.1    | 0.57                   |
| isogroup14032 | isotig30644                                                                                                                                                                                                                                                                                                                             | tubulin Uni3 [ <i>Chlamydomonas reinhardtii</i> ]                                                           | AAB71840.1     | 1.58                   |
| isogroup00402 | isotig05836-05838                                                                                                                                                                                                                                                                                                                       | ubiquitin [ <i>Dianthus caryophyllus</i> ]                                                                  | BAL61088.1     | 1.04                   |
| isogroup03515 | isotig16337-16338                                                                                                                                                                                                                                                                                                                       | E2 ubiquitin-conjugating enzyme [ <i>Chlamydomonas reinhardtii</i> ]                                        | XP_001703521.1 | 1.42                   |
| isogroup04902 | isotig19091                                                                                                                                                                                                                                                                                                                             | PREDICTED: ubiquitin conjugation factor E4 A-like [ <i>Saccoglossus kowalevskii</i> ]                       | XP_002733556.1 | 1.00                   |
| isogroup05543 | isotig20373-20374                                                                                                                                                                                                                                                                                                                       | ubiquitin conjugating enzyme E2 [ <i>Chlamydomonas reinhardtii</i> ]                                        | XP_001690015.1 | 0.92                   |
| isogroup06010 | isotig21307-21308                                                                                                                                                                                                                                                                                                                       | ubiquitin conjugating enzyme [ <i>Chlamydomonas reinhardtii</i> ]                                           | XP_001689734.1 | 0.93                   |
| isogroup09489 | isotig26101                                                                                                                                                                                                                                                                                                                             | PREDICTED: LOW QUALITY PROTEIN: ubiquitin-60S ribosomal protein L40-like [ <i>Brachypodium distachyon</i> ] | XP_003561800.1 | 1.33                   |
| isogroup13015 | isotig29627                                                                                                                                                                                                                                                                                                                             | Ubiquitin-conjugating enzyme E2 S [ <i>Rana catesbeiana</i> ]                                               | C1C3R6.1       | 0.71                   |
| isogroup06450 | isotig22187-22188                                                                                                                                                                                                                                                                                                                       | small ubiquitin-like modifier 2 [ <i>Chlamydomonas reinhardtii</i> ]                                        | XP_001695782.1 | 1.29                   |
| isogroup11292 | isotig27904                                                                                                                                                                                                                                                                                                                             | small ubiquitin-like modifier 1 [ <i>Chlamydomonas reinhardtii</i> ]                                        | XP_001695783.1 | 0.51                   |
| isogroup14914 | isotig31526                                                                                                                                                                                                                                                                                                                             | small ubiquitin-like modifier 2 [ <i>Chlamydomonas reinhardtii</i> ]                                        | XP_001695782.1 | 1.18                   |
| isogroup00001 | contig00258                                                                                                                                                                                                                                                                                                                             | eukaryotic translation elongation factor 1 alpha 1 [ <i>Chlamydomonas reinhardtii</i> ]                     | XP_001696568.1 | 1.65                   |
| isogroup00131 | isotig03317-03318                                                                                                                                                                                                                                                                                                                       | elongation factor-1 alpha-like protein [ <i>Gonium pectorale</i> ]                                          | BAF99250.1     | 1.48                   |
| isogroup00360 | isotig05597-05602                                                                                                                                                                                                                                                                                                                       | elongation factor 2 [ <i>Chlamydomonas reinhardtii</i> ]                                                    | XP_001703215.1 | 1.76                   |
| isogroup00675 | isotig07555-07556                                                                                                                                                                                                                                                                                                                       | elongation factor-1 alpha-like protein [ <i>Gonium pectorale</i> ]                                          | BAF99250.1     | 1.43                   |
| isogroup01142 | isotig09649-09652                                                                                                                                                                                                                                                                                                                       | elongation factor-like protein [ <i>Volvox carteri f. nagariensis</i> ]                                     | XP_002958738.1 | 1.02                   |
| isogroup02653 | isotig14629-14630                                                                                                                                                                                                                                                                                                                       | elongation factor EF-Tu-like protein [ <i>Chlamydomonas reinhardtii</i> ]                                   | XP_001699617.1 | 1.89                   |
| isogroup09537 | isotig26149                                                                                                                                                                                                                                                                                                                             | elongation factor-like protein [ <i>Chlamydomonas reinhardtii</i> ]                                         | XP_001699137.1 | 2.37                   |
| isogroup10338 | isotig26950                                                                                                                                                                                                                                                                                                                             | elongation factor 1-alpha, putative [ <i>Ricinus communis</i> ]                                             | XP_002518073.1 | 2.58                   |
| isogroup10956 | isotig27568                                                                                                                                                                                                                                                                                                                             | translational elongation factor Tu [ <i>Chlamydomonas moewusii</i> ]                                        | ABU88343.1     | 1.64                   |
| isogroup13009 | isotig29621                                                                                                                                                                                                                                                                                                                             | elongation factor-like protein [ <i>Chlamydomonas reinhardtii</i> ]                                         | XP_001699137.1 | 4.27                   |
| isogroup15403 | isotig32015                                                                                                                                                                                                                                                                                                                             | elongation factor 2 [ <i>Parachlorella kessleri</i> ]                                                       | P28996.1       | 3.32                   |
| isogroup18882 | isotig35494                                                                                                                                                                                                                                                                                                                             | translational elongation factor EF-1, subunit alpha [ <i>Vulcanisaeta distributa</i> DSM 14429]             | YP_003901148.1 | 4.75                   |

Table S3-2. Housekeeping genes in the *H. pluvialis* transcriptome.

| Isogroup      | Isotig number     | Description                                                                                                 | Accession      | Read ratio (Red/Green) |
|---------------|-------------------|-------------------------------------------------------------------------------------------------------------|----------------|------------------------|
| isogroup10661 | isotig27273       | phosphoglycerate mutase [ <i>Chlamydomonas reinhardtii</i> ]                                                | XP_001701935.1 | 1.04                   |
| isogroup12479 | isotig29091       | phosphoglycerate mutase [ <i>Chlamydomonas reinhardtii</i> ]                                                | XP_001702221.1 | 0.95                   |
| isogroup01467 | isotig10867-10869 | phosphoglycerate mutase [ <i>Volvox carteri f. nagariensis</i> ]                                            | XP_002947424.1 | 1.09                   |
| isogroup02719 | isotig14761-14762 | phosphoglycerate mutase [ <i>Chlamydomonas reinhardtii</i> ]                                                | XP_001703522.1 | 0.90                   |
| isogroup04022 | isotig17331-17332 | phosphoglycerate mutase [ <i>Chlamydomonas reinhardtii</i> ]                                                | XP_001696212.1 | 2.17                   |
| isogroup06559 | isotig22405-22406 | phosphoglycerate mutase [ <i>Chlamydomonas reinhardtii</i> ]                                                | XP_001698403.1 | 1.42                   |
| isogroup03238 | isotig15793-15794 | 60S ribosomal protein L11 [ <i>Elaeis guineensis</i> ]                                                      | ACF06486.1     | 0.90                   |
| isogroup10723 | isotig27335       | 60S ribosomal protein L18a-2 [ <i>Coccomyxa subellipsoidea</i> C-169]                                       | EIE27736.1     | 0.80                   |
| isogroup06230 | isotig21747-21748 | 60S ribosomal protein L18a-2 [ <i>Coccomyxa subellipsoidea</i> C-169]                                       | EIE27736.1     | 1.22                   |
| isogroup09489 | isotig26101       | PREDICTED: LOW QUALITY PROTEIN: ubiquitin-60S ribosomal protein L40-like [ <i>Brachypodium distachyon</i> ] | XP_003561800.1 | 1.33                   |
| isogroup17490 | isotig34102       | 60S ribosomal protein L30 [ <i>Loa loa</i> ]                                                                | XP_003141401.1 | 0.88                   |
| isogroup02469 | isotig14168-14169 | 60S acidic ribosomal protein P2, putative [ <i>Aspergillus clavatus</i> NRRL 1]                             | XP_001275311.1 | 0.66                   |
| isogroup03516 | isotig16339-16340 | 60S acidic ribosomal-like protein P2 [ <i>Phragmatopoma lapidosa</i> ]                                      | AEF59082.1     | 0.90                   |
| isogroup03407 | isotig16127-6128  | 40S ribosomal protein S5 [ <i>Chlamydomonas</i> sp. ICE-L]                                                  | CAJ45370.1     | 1.31                   |
| isogroup06284 | isotig21855-21856 | plastid/chloroplast ribosomal protein L19 [ <i>Volvox carteri f. nagariensis</i> ]                          | XP_002956886.1 | 1.61                   |
| isogroup11516 | isotig28128       | mitochondrial ribosomal protein L19 [ <i>Chlamydomonas reinhardtii</i> ]                                    | XP_001700862.1 | 2.41                   |
| isogroup03415 | isotig16143-16144 | ribosomal protein L32 [ <i>Chlamydomonas reinhardtii</i> ]                                                  | XP_001695517.1 | 1.12                   |
| isogroup00131 | isotig03315-03316 | eukaryotic translation initiation factor 1 alpha 1 [ <i>Volvox carteri f. nagariensis</i> ]                 | XP_002945791.1 | 1.48                   |
| isogroup07525 | isotig24137       | eukaryotic translation initiation factor 3c [ <i>Volvox carteri f. nagariensis</i> ]                        | XP_002947123.1 | 1.94                   |
| isogroup10009 | isotig26621       | eukaryotic translation initiation factor 3f [ <i>Volvox carteri f. nagariensis</i> ]                        | XP_002950817.1 | 1.35                   |
| isogroup10956 | isotig27568       | translational elongation factor Tu [ <i>Chlamydomonas moewusii</i> ]                                        | ABU88343.1     | 1.64                   |
| isogroup00721 | isotig07752-07755 | malate dehydrogenase [ <i>Volvox carteri f. nagariensis</i> ]                                               | XP_002954828.1 | 2.70                   |
| isogroup02938 | isotig15198-15199 | malate dehydrogenase [ <i>Chlamydomonas reinhardtii</i> ]                                                   | XP_001693118.1 | 2.10                   |
| isogroup08260 | isotig24872       | malate dehydrogenase, cytoplasmic [ <i>Chlorella variabilis</i> ]                                           | EFN52647.1     | 1.28                   |
| isogroup10899 | isotig27511       | malate dehydrogenase [ <i>Chlamydomonas reinhardtii</i> ]                                                   | XP_001703167.1 | 0.84                   |
| isogroup11265 | isotig27877       | malate dehydrogenase [ <i>Chlamydomonas reinhardtii</i> ]                                                   | XP_001703167.1 | 1.16                   |
| isogroup00545 | isotig06783       | mitogen activated protein kinase kinase kinase 11 [ <i>Chlamydomonas reinhardtii</i> ]                      | XP_001699990.1 | 1.54                   |
| isogroup02723 | isotig14769-14770 | mitogen activated protein kinase kinase kinase 11 [ <i>Chlamydomonas reinhardtii</i> ]                      | XP_001699990.1 | 0.24                   |
| isogroup04451 | isotig18189-18190 | mitogen activated protein kinase kinase kinase 11 [ <i>Chlamydomonas reinhardtii</i> ]                      | XP_001699990.1 | 1.34                   |
| isogroup11100 | isotig27712       | mitogen activated protein kinase kinase kinase 11 [ <i>Chlamydomonas reinhardtii</i> ]                      | XP_001699990.1 | 1.90                   |
| isogroup16395 | isotig33007       | mitogen activated protein kinase kinase kinase 11 [ <i>Chlamydomonas reinhardtii</i> ]                      | XP_001699990.1 | 0.95                   |
| isogroup04790 | isotig18867       | cyclophilin-like protein [ <i>Coccomyxa subellipsoidea</i> C-169]                                           | EIE24486.1     | 1.54                   |
| isogroup05066 | isotig19420       | cyclophilin-like protein [ <i>Chlamydomonas reinhardtii</i> ]                                               | XP_001701607.1 | 0.61                   |
| isogroup13056 | isotig29668       | cyclophilin-like protein [ <i>Chlamydomonas reinhardtii</i> ]                                               | XP_001701608.1 | 4.27                   |
| isogroup00452 | isotig06258-06259 | phosphoglycerate kinase [ <i>Chlamydomonas reinhardtii</i> ]                                                | XP_001699523.1 | 0.7                    |
| isogroup02274 | isotig13585       | phosphoglycerate kinase [ <i>Chlamydomonas reinhardtii</i> ]                                                | XP_001702049.1 | 1.2                    |
| isogroup09035 | isotig25647       | phosphoglycerate kinase [ <i>Chlamydomonas reinhardtii</i> ]                                                | XP_001699523.1 | 0.43                   |
| isogroup01257 | isotig10109-10112 | glyceraldehyde 3-phosphate dehydrogenase [ <i>Chlamydomonas reinhardtii</i> ]                               | XP_001702068.1 | 1.12                   |
| isogroup03130 | isotig15580-15581 | chloroplast glyceraldehyde-3-phosphate dehydrogenase [ <i>Dunaliella viridis</i> ]                          | ABC00187.1     | 1.08                   |
| isogroup04914 | isotig19115-19116 | chloroplast glyceraldehyde-3-phosphate dehydrogenase [ <i>Dunaliella viridis</i> ]                          | ABC00187.1     | 0.95                   |
| isogroup04535 | isotig18358       | tetratricopeptide repeat protein [ <i>Myxococcus xanthus</i> DK 1622]                                       | YP_629366.1    | 5.71                   |
| isogroup14465 | isotig31077       | tetratricopeptide repeat protein, circadian expression [ <i>Chlamydomonas reinhardtii</i> ]                 | XP_001699965.1 | 1.04                   |
| isogroup15560 | isotig32172       | tetratricopeptide repeat protein, circadian expression [ <i>Chlamydomonas reinhardtii</i> ]                 | XP_001699965.1 | 5.71                   |
| isogroup02916 | isotig15154       | glycogen synthase kinase 3 [ <i>Chlamydomonas reinhardtii</i> ]                                             | XP_001690881.1 | 2.29                   |
| isogroup08750 | isotig25362       | glycogen synthase kinase 3 [ <i>Chlamydomonas reinhardtii</i> ]                                             | XP_001690881.1 | 0.97                   |
| isogroup06954 | isotig23195       | polyadenylate binding protein [ <i>Coccomyxa subellipsoidea</i> C-169]                                      | EIE25350.1     | 0.55                   |
| isogroup18104 | isotig34716       | polyadenylate-binding protein, putative [ <i>Ricinus communis</i> ]                                         | XP_002511041.1 | 1.90                   |
| isogroup09130 | isotig25742       | protein disulfide isomerase [ <i>Chlamydomonas reinhardtii</i> ]                                            | XP_001699770.1 | 0.87                   |
| isogroup15365 | isotig31977       | protein disulfide isomerase [ <i>Chlamydomonas reinhardtii</i> ]                                            | XP_001699351.1 | 1.04                   |
| isogroup15902 | isotig32514       | PREDICTED: DNA-directed RNA polymerases I, II, and III subunit RPABC5-like [ <i>Glycine max</i> ]           | XP_003526546.1 | 1.24                   |
| isogroup16107 | isotig32719       | PREDICTED: DNA-directed RNA polymerases I, II, and III subunit RPABC5-like [ <i>Glycine max</i> ]           | XP_003526546.1 | 1.99                   |

Table S3-3. Housekeeping genes in the *H. pluvialis* transcriptome.

| Isogroup      | Isotig number     | Description                                                                               | Accession      | Read ratio (Red/Green) |
|---------------|-------------------|-------------------------------------------------------------------------------------------|----------------|------------------------|
| isogroup09735 | isotig26347       | adenosine deaminase [ <i>Acinetobacter</i> sp. P8-3-8]                                    | ZP_09141828.1  | 1.22                   |
| isogroup02873 | isotig15068-15069 | lysyl-trna synthetase, LysRS [ <i>Chlamydomonas reinhardtii</i> ]                         | XP_001697493.1 | 2.35                   |
| isogroup16588 | isotig33200       | 6-phosphogluconate dehydrogenase, decarboxylating [ <i>Chlamydomonas reinhardtii</i> ]    | XP_001696880.1 | 1.42                   |
| isogroup01651 | isotig11444-11447 | hexokinase [ <i>Volvox carteri f. nagariensis</i> ]                                       | XP_002956604.1 | 2.20                   |
| isogroup00236 | isotig04487-4498  | glucose-6-phosphate isomerase [ <i>Dunaliella salina</i> ]                                | ACI29026.1     | 1.36                   |
| isogroup01284 | isotig10217-10220 | enolase [ <i>Dunaliella salina</i> ]                                                      | AAO86694.1     | 2.08                   |
| isogroup04820 | isotig18927-18928 | mitochondrial cytochrome c oxidase subunit 4, 13 kD [ <i>Chlamydomonas reinhardtii</i> ]  | XP_001693699.1 | 1.38                   |
| isogroup03416 | isotig16145-16146 | TPA_inf: mitochondrial ATP synthase subunit delta [ <i>Polytomella parva</i> ]            | ADE92943.1     | 1.09                   |
| isogroup02249 | isotig13510-13511 | 20S proteasome beta subunit, type 4 [ <i>Chlamydomonas reinhardtii</i> ]                  | XP_001695438.1 | 1.11                   |
| isogroup11159 | isotig27771       | ADP-ribosylation factor 1 [ <i>Coccomyxa subellipsoidea</i> C-169]                        | EIE19146.1     | 1.14                   |
| isogroup02140 | isotig13184       | cytidine deaminase [ <i>Volvox carteri f. nagariensis</i> ]                               | XP_002949245.1 | 0.91                   |
| isogroup04756 | isotig18799-18800 | spermidine synthase [ <i>Chlamydomonas reinhardtii</i> ]                                  | XP_001702843.1 | 2.25                   |
| isogroup01256 | isotig10105-10108 | serine/threonine protein kinase 19 [ <i>Chlamydomonas reinhardtii</i> ]                   | XP_001690043.1 | 1.76                   |
| isogroup01442 | isotig10792-10794 | succinate dehydrogenase subunit A, mitochondrial [ <i>Volvox carteri f. nagariensis</i> ] | XP_002949632.1 | 1.14                   |
| isogroup04881 | isotig19049-19050 | small nuclear ribonucleoprotein Sm D2 [ <i>Chlamydomonas reinhardtii</i> ]                | XP_001698348.1 | 1.12                   |

Table S4. Membrane glycerolipid biosynthesis-related genes in the *H. pluvialis* transcriptome.

| Isogroup      | Isotig number     | Description                                                                                  | Accession      | Read ratio (Red/Green) |
|---------------|-------------------|----------------------------------------------------------------------------------------------|----------------|------------------------|
| isogroup04513 | isotig18313-18314 | UDP-sulfoquinovose synthase [ <i>Chlamydomonas reinhardtii</i> ]                             | XP_001697898.1 | 1.99                   |
| isogroup00935 | Isotig08834-08837 | phosphatidate cytidyltransferase [ <i>Chlamydomonas reinhardtii</i> ]                        | XP_001691839.1 | 2.14                   |
| isogroup02829 | Isotig14980-14981 | phosphatidate cytidyltransferase [ <i>Chlamydomonas reinhardtii</i> ]                        | XP_001691107.1 | 1.32                   |
| isogroup05358 | Isotig20003-20004 | phosphatidylglycerophosphate synthase [ <i>Chlamydomonas reinhardtii</i> ]                   | XP_001701223.1 | 1.58                   |
| isogroup12714 | isotig29326       | phosphatidylglycerolphosphate synthase 2 [ <i>Arabidopsis thaliana</i> ]                     | NP_191063.1    | 1.58                   |
| isogroup04232 | Isotig117751-7752 | membrane bound O-acyl transferase family protein<br>[ <i>Coccomyxa subellipsoidea</i> C-169] | EIE25092.1     | 2.57                   |
| isogroup08206 | isotig24818       | membrane bound O-acyl transferase family protein<br>[ <i>Coccomyxa subellipsoidea</i> C-169] | EIE25092.1     | 0.75                   |
| isogroup12281 | isotig28893       | phospholipase A2 [ <i>Chlamydomonas reinhardtii</i> ]                                        | XP_001699857.1 | 1.66                   |
| isogroup03847 | Isotig16981-16982 | phosphoethanolamine N-methyltransferase [ <i>Spinacia oleracea</i> ]                         | Q9M571.1       | 2.02                   |
| isogroup04400 | Isotig18087-18088 | CTP-phosphoethanolamine cytidyltransferase<br>[ <i>Coccomyxa subellipsoidea</i> C-169]       | XP_005647873.1 | 1.40                   |
| isogroup11956 | isotig28568       | phosphatidylinositol synthase [ <i>Volvox carteri f. nagariensis</i> ]                       | XP_002948374.1 | 2.06                   |



## Supplementary figures

Fig. S1.

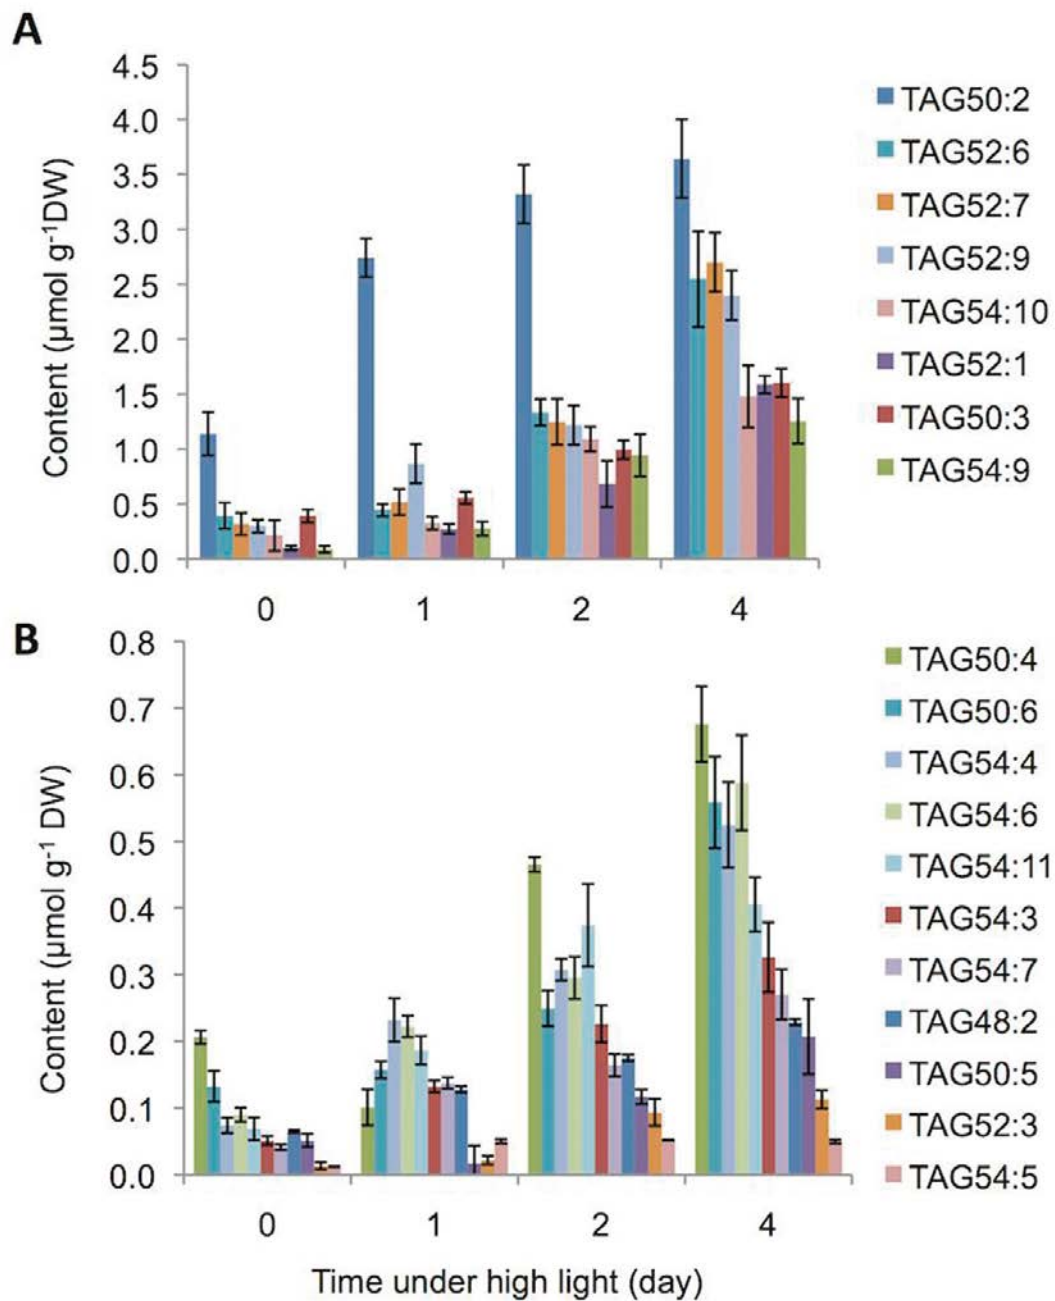

Fig. S1. Minor (A) and trace (B) triacylglycerol (TAG) species in *H. pluvialis*.

Fig. S2.

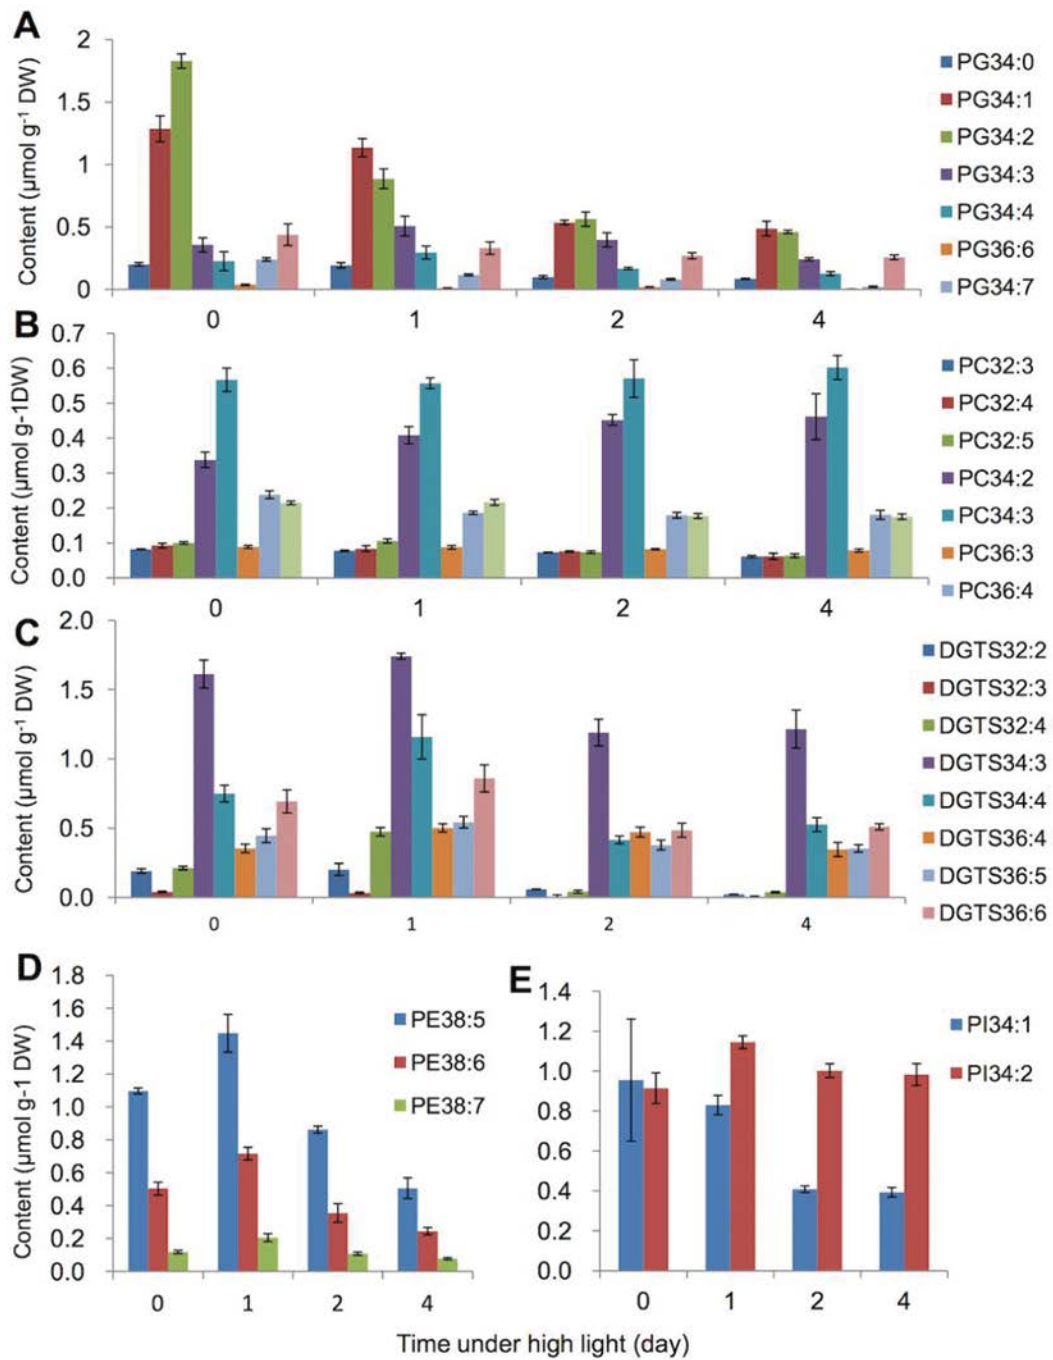

Fig. S2. Profile and quantification of PG (A), PC (B), DGTS (C), PI (D) and PE (E) in *H. pluvialis*. DGTS, Diacylglyceryltrimethylhomo-Ser; PC, Phosphatidylcholine; PE, Phosphatidylethanolamine; PG, Phosphatidylglycerol; PI, Phosphatidylinositol.

Fig. S3.

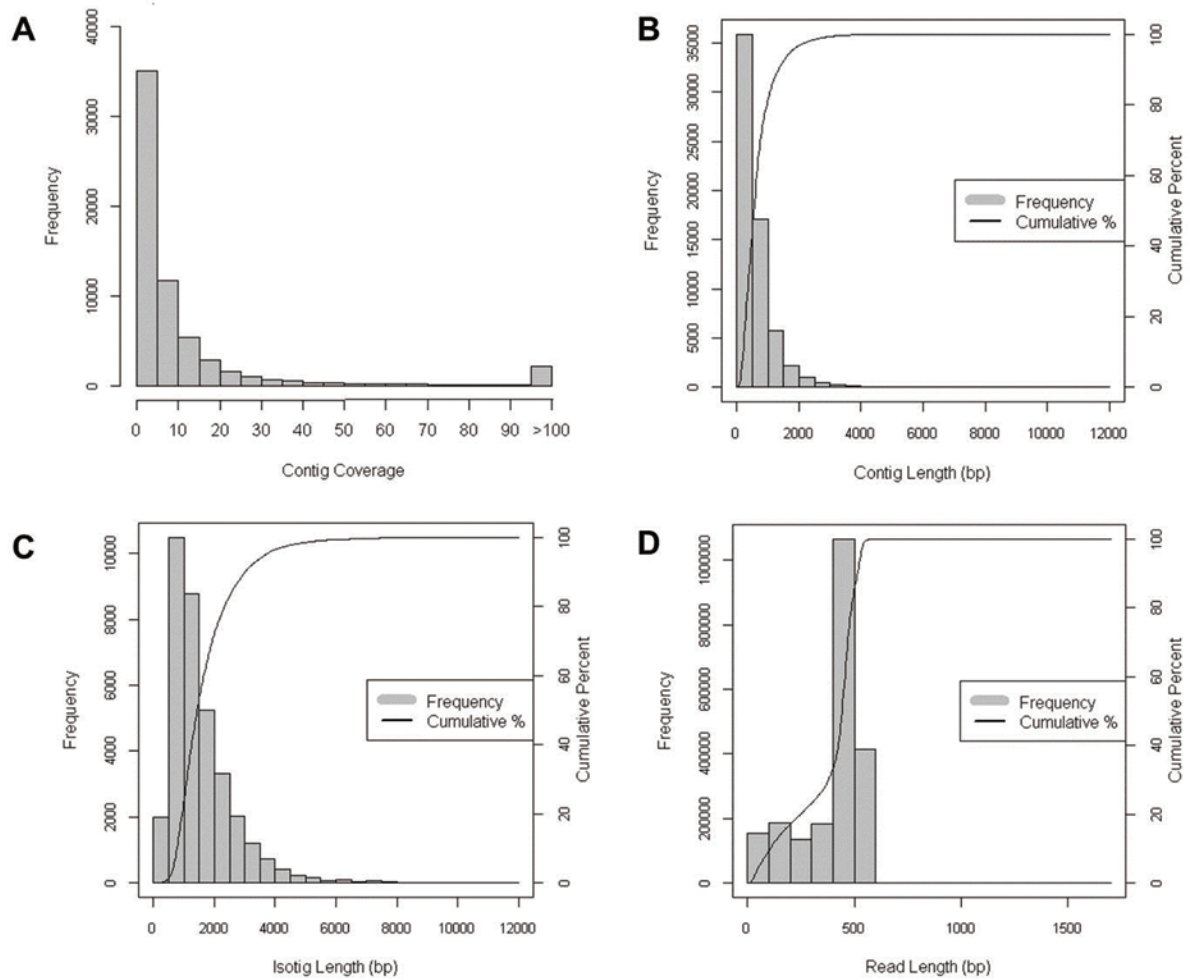

Fig. S3. The length and coverage of contigs, isotigs, and reads from the *H. pluvialis* transcriptome database. Panels A and B represent the contig coverage and length, respectively. Panels C and D indicate the length of isotigs and reads, respectively.

Fig. S4a.

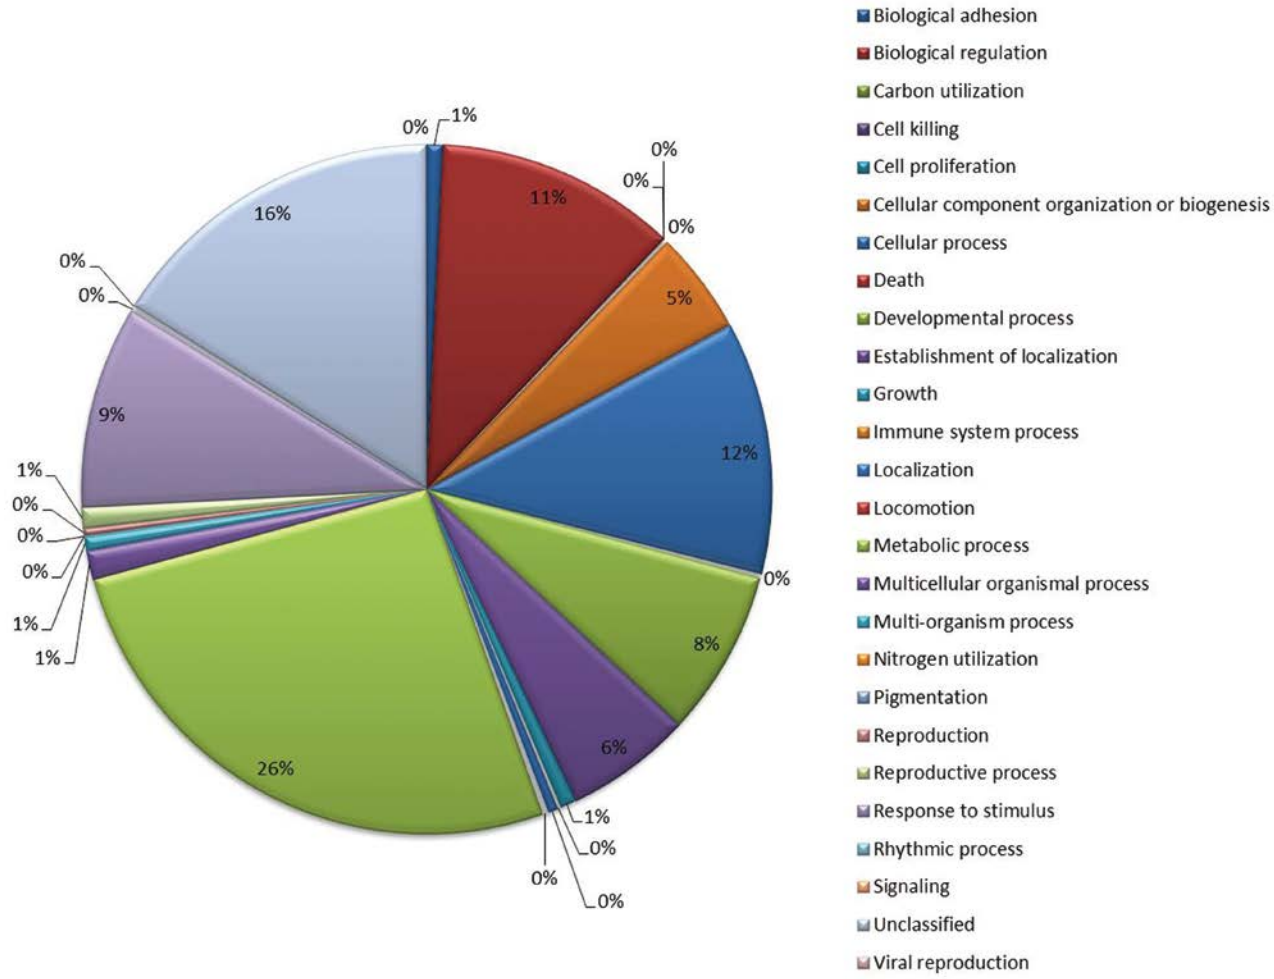

Fig. S4b.

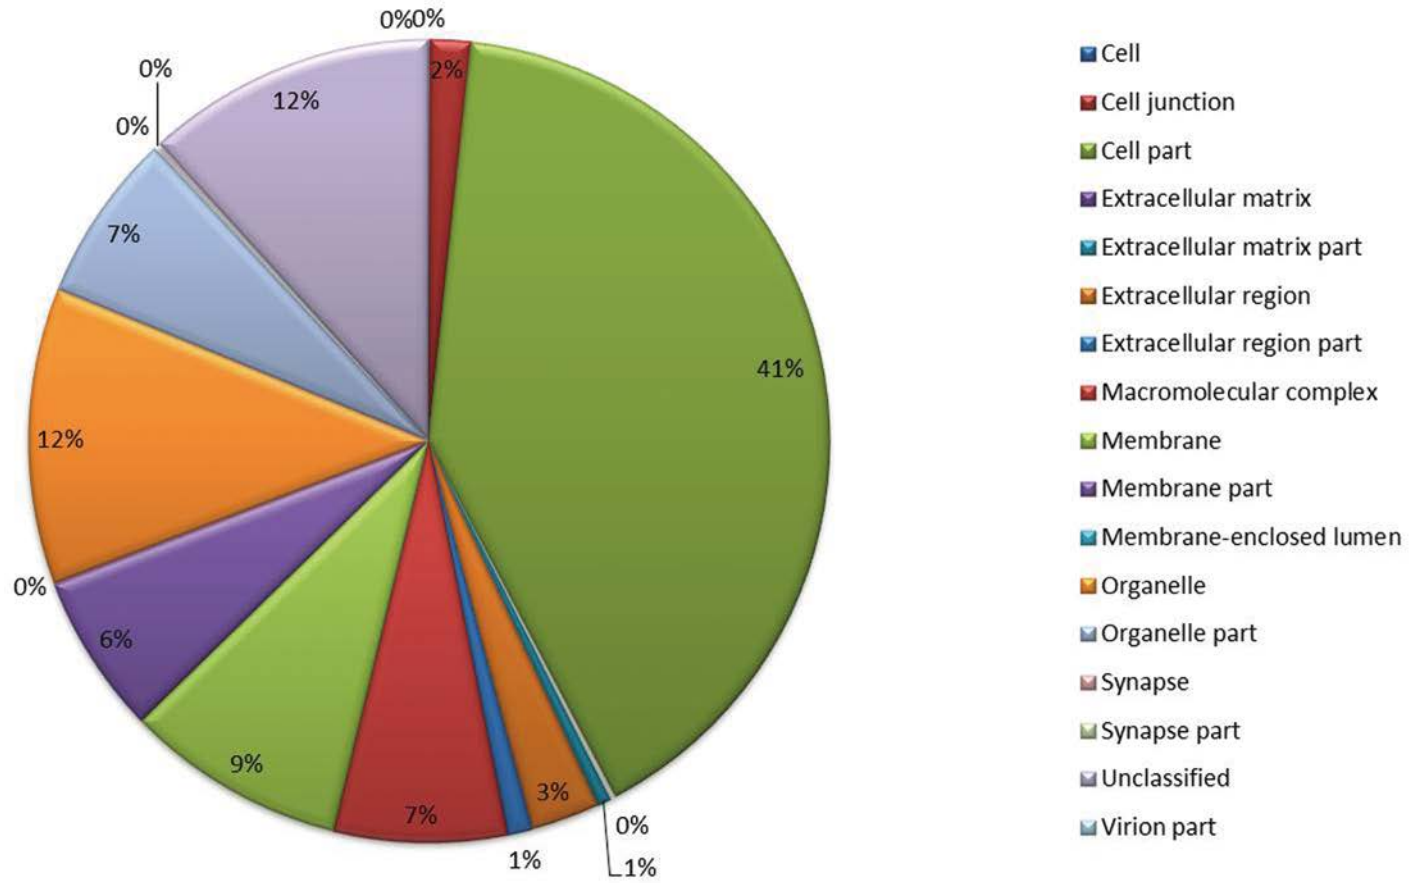

Fig. S4c.

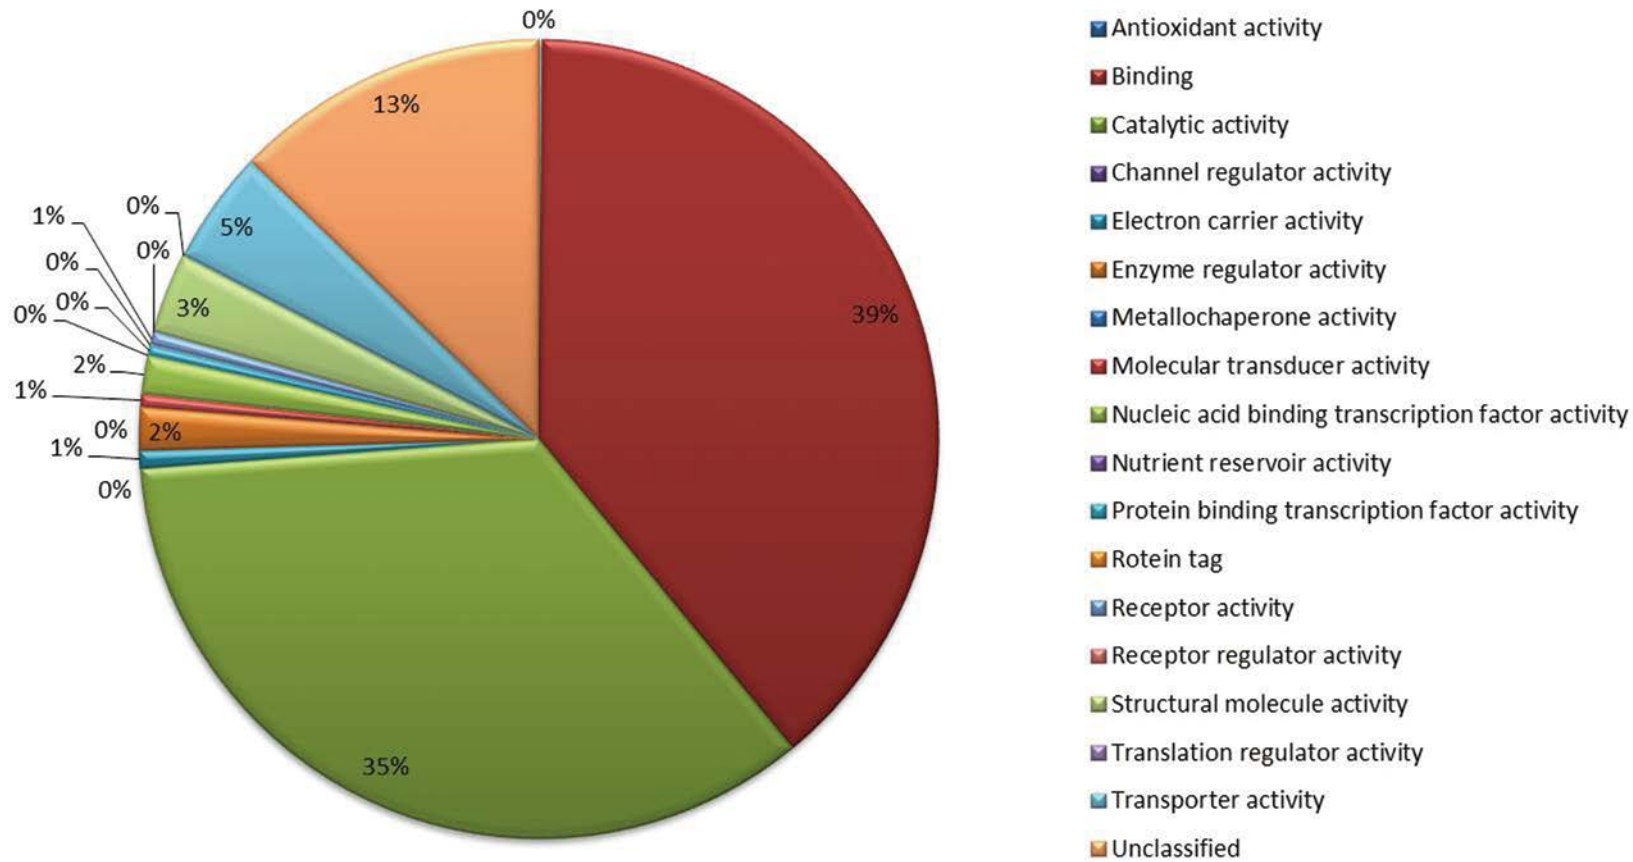

Fig. S4. A detailed analysis of GO terms of the three functional classes of *H. pluvialis*. The total of 61 GO terms were assigned to 22,431 cDNAs (including isotigs and contigs). A: biological processes; B: cellular components; C: molecular functions.

Fig. S5.

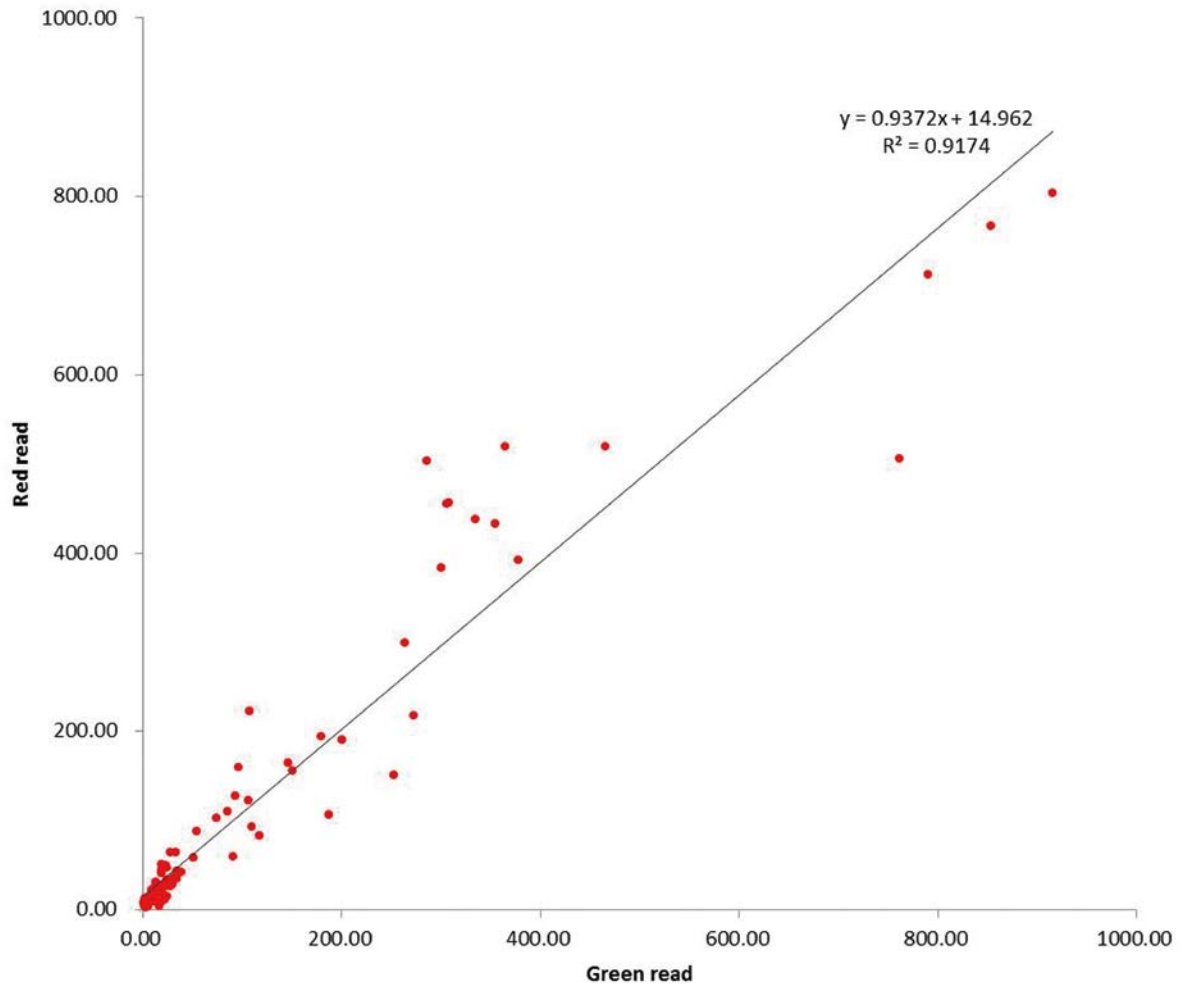

Fig. S5. Correlation plot of housekeeping genes in *H. pluvialis* transcriptomes. The slope value is 0.9372 and the  $R^2$  value is 0.9174.

Fig. S6a.

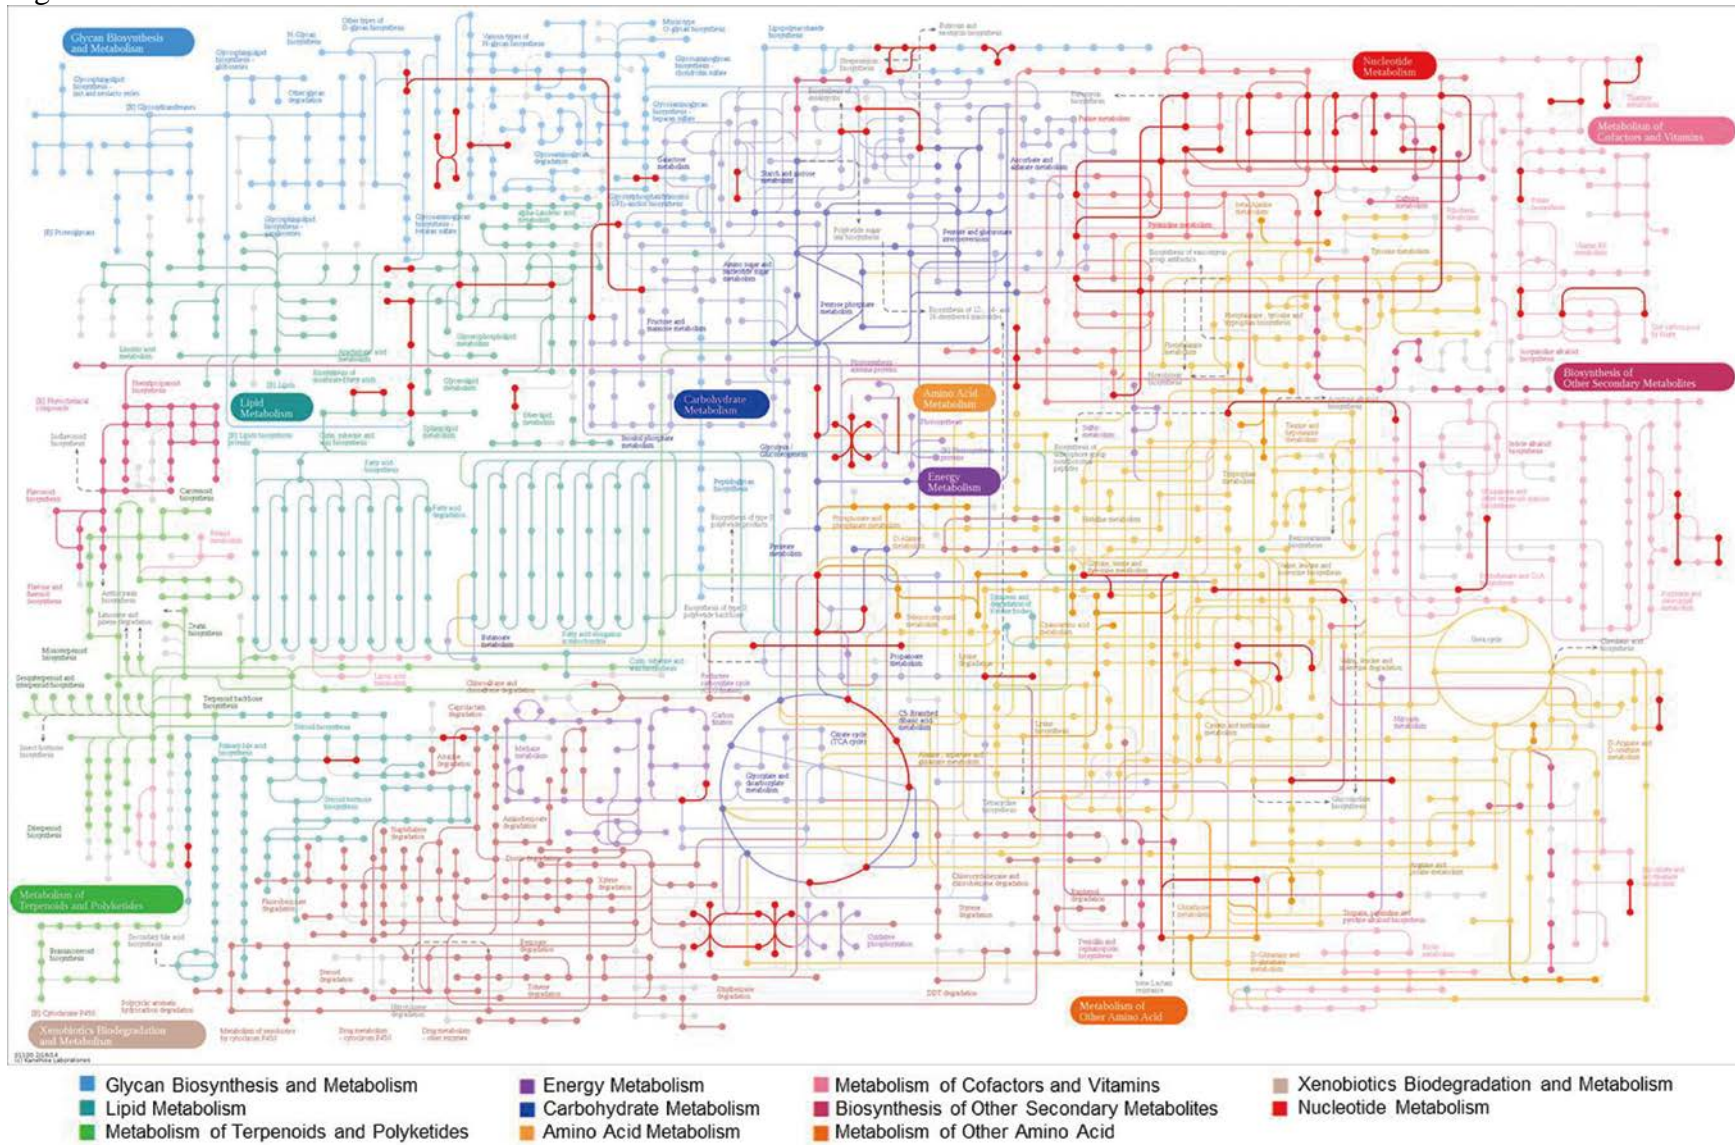



Fig.S6b.

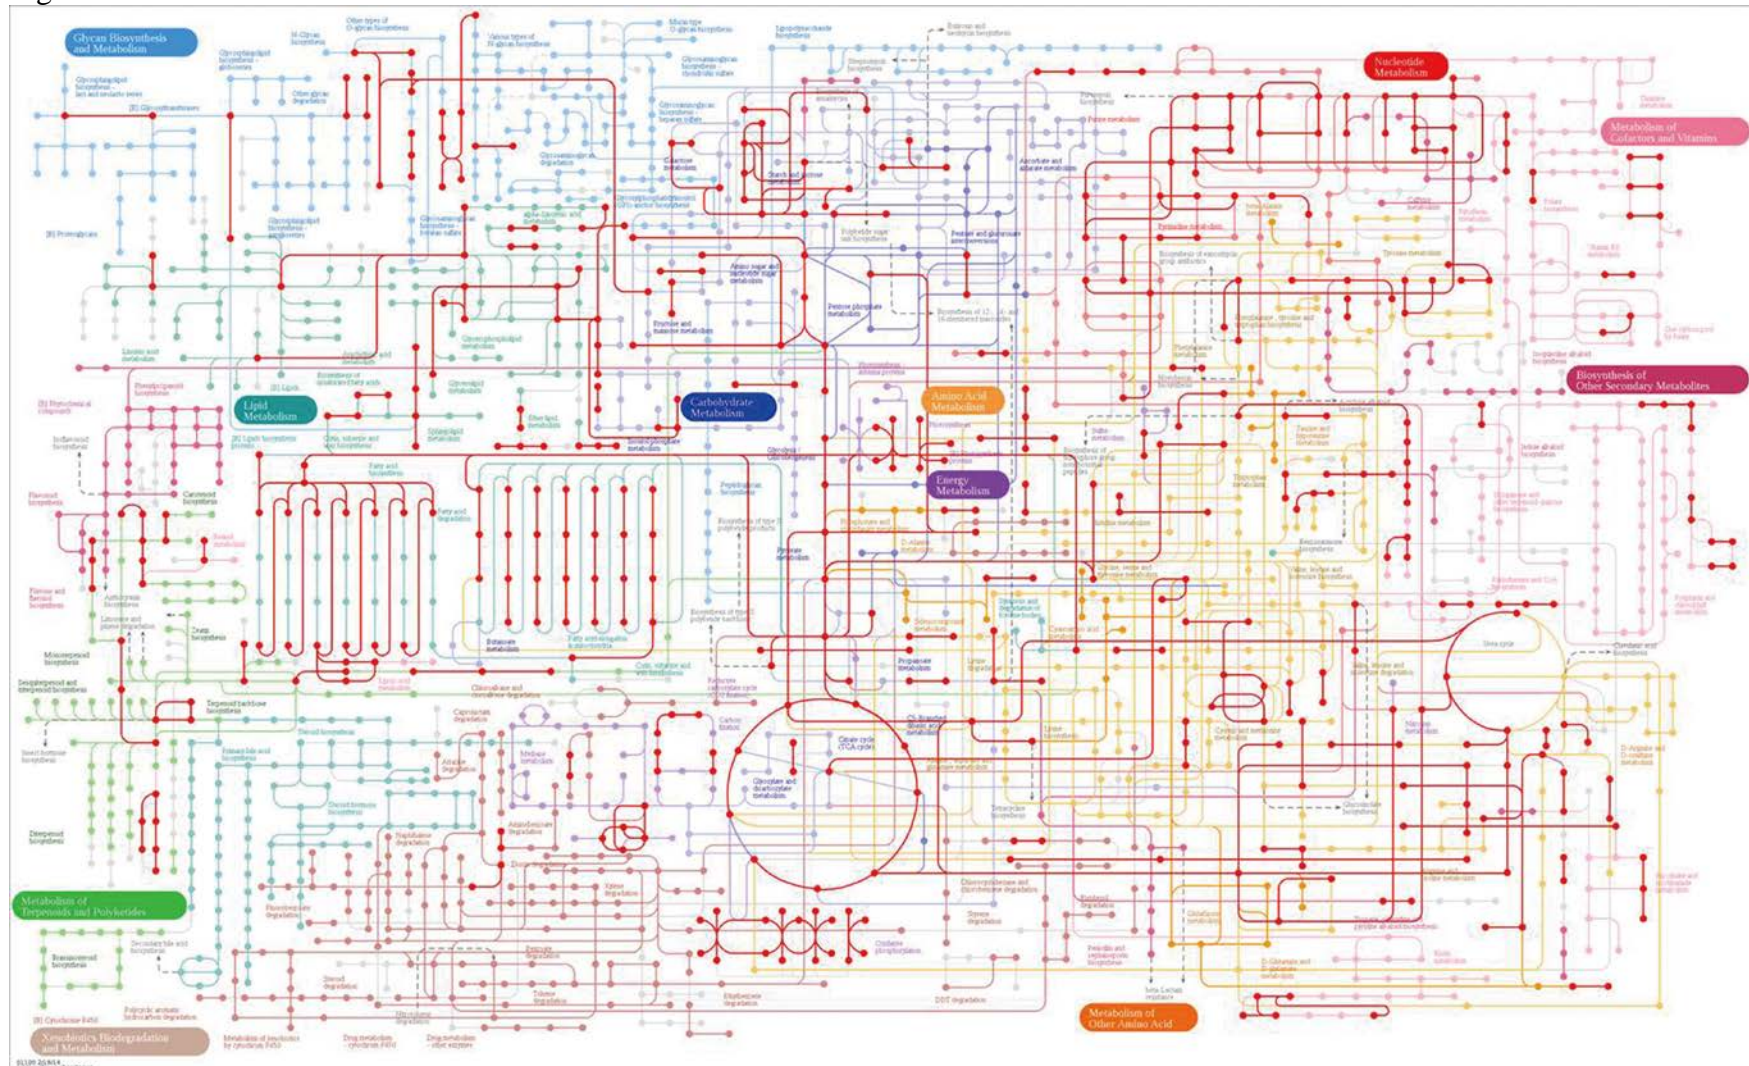

- |                                                                               |                                                                 |                                                                                    |                                                                                |
|-------------------------------------------------------------------------------|-----------------------------------------------------------------|------------------------------------------------------------------------------------|--------------------------------------------------------------------------------|
| <span style="color: blue;">■</span> Glycan Biosynthesis and Metabolism        | <span style="color: purple;">■</span> Energy Metabolism         | <span style="color: pink;">■</span> Metabolism of Cofactors and Vitamins           | <span style="color: brown;">■</span> Xenobiotics Biodegradation and Metabolism |
| <span style="color: teal;">■</span> Lipid Metabolism                          | <span style="color: darkblue;">■</span> Carbohydrate Metabolism | <span style="color: magenta;">■</span> Biosynthesis of Other Secondary Metabolites | <span style="color: red;">■</span> Nucleotide Metabolism                       |
| <span style="color: green;">■</span> Metabolism of Terpenoids and Polyketides | <span style="color: orange;">■</span> Amino Acid Metabolism     | <span style="color: darkorange;">■</span> Metabolism of Other Amino Acid           |                                                                                |

Fig. S6. KEGG pathway analysis of *H. pluvialis* showing differential gene expression (above two fold) between macrozooids (A) and cysts (B). The transcripts expressed at a higher level in cysts were those encoding proteins involved in a wide range of metabolisms.

Fig. S7.

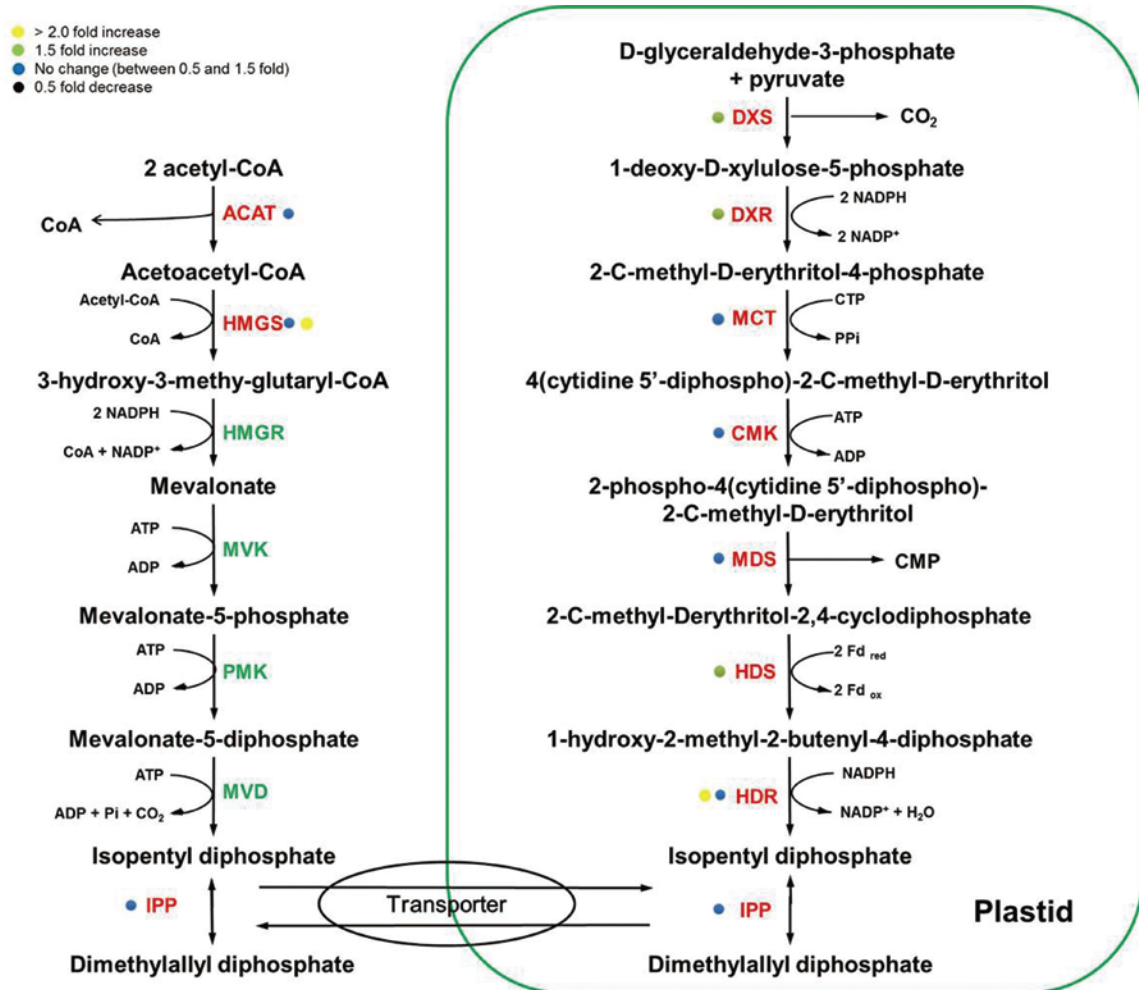

Fig. S7. Mevalonate (MVA) and 2-C-methyl-D-erythritol 4-phosphate (MEP) pathways in *H. pluvialis*. All MEP pathway-related genes were present in *H. pluvialis*. However, only three genes were identified in the mevalonate pathway. The dot color indicates the normalized read number ratio of red (haematocyst) per green (macrozooid) cells, and each dot stands for independent isogroup (gene). ACAT, acetyl-CoA C-acetyltransferase; HMGS, hydroxymethylglutaryl-CoA synthase; HMGR, hydroxymethylglutaryl-CoA reductase; MVK, mevalonate kinase; PMK, phosphomevalonate kinase; MVD, mevalonate diphosphate decarboxylase; DXS, 1-deoxy-D-xylulose-5-phosphate synthase; DXR, 1-deoxy-D-xylulose 5-phosphate reductoisomerase; MCT, 2-C-methyl-D-erythritol 4-phosphate cytidyltransferase; CMK, 4-diphosphocytidyl-2C-methyl-D-erythritol kinase; MDS, 2-C-methyl-D-erythritol 2,4-cyclodiphosphate synthase; HDS, 1-hydroxy-2-methyl-2-(E)-butenyl-4-diphosphate synthase; HDR, 4-hydroxy-3-methylbut-2-enyl diphosphate reductase; IPP: isopentenyl diphosphate isomerase.

Fig. S8.

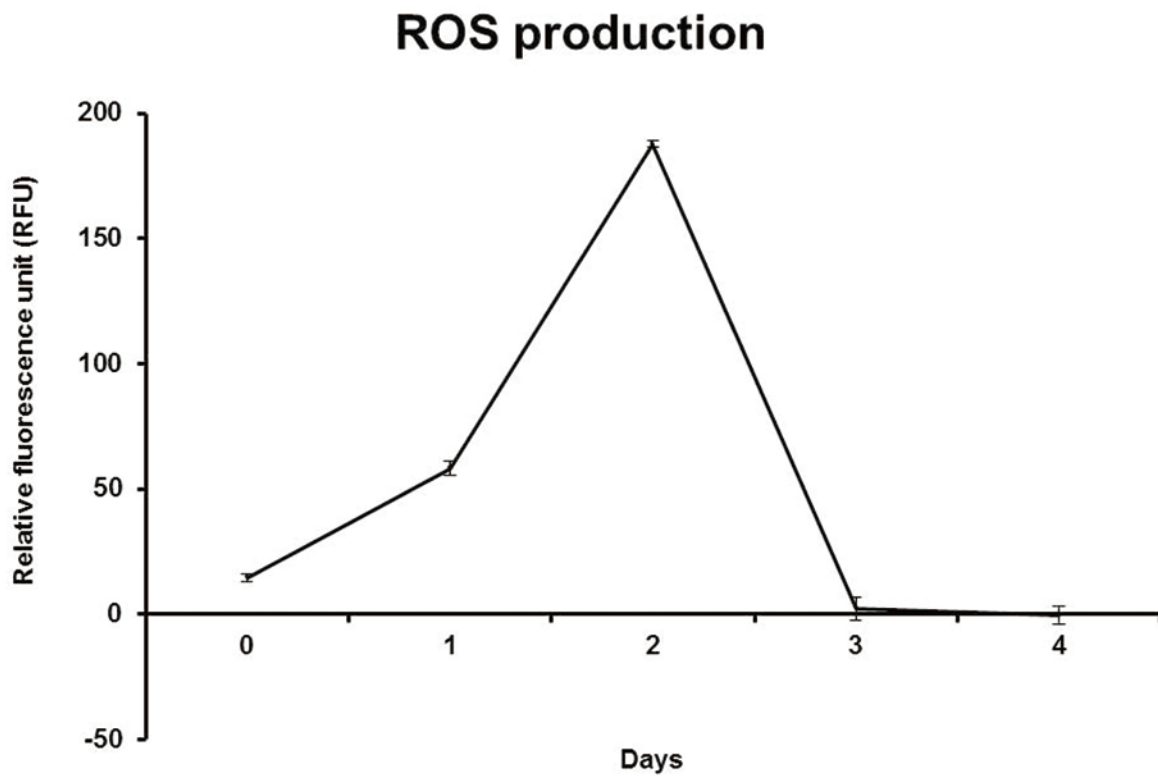

Fig. S8. ROS production of *H. pluvialis*. The late exponential cells of macrozooid were exposed to high light conditions ( $400 \mu\text{mol}\cdot\text{photon}\cdot\text{m}^{-2}\cdot\text{s}^{-1}$ ) for 4 days and the ROS produced from *Haematococcus* cells was measured using  $\text{H}_2\text{DCFDA}$ . The ROS production was expressed by the relative fluorescence unit, which is a fluorescence value normalized by the amounts of cells. Values represent mean  $\pm$  SD ( $n=3$ ).
