# Supplementary material for: Comparative analyses of lipidomes and transcriptomes reveal a concerted action of multiple defensive systems against photooxidative stress in Haematococcus pluvialis
Source: PubMed Central journal article supplement (PMC4112636; doi:10.1093/jxb/eru206), 2014-05-12

# **Comparative analyses of lipidomes and transcriptomes reveal a concerted action of multiple defensive systems against photooxidative stress in *Haematococcus pluvialis***

**Yunho Gwak<sup>1+</sup>, Yong-sic Hwang<sup>2+</sup>, Baobei Wang<sup>3</sup>, Minju Kim<sup>1</sup>, Jooyeon Jeong<sup>1</sup>, Choul-Gyun Lee<sup>4</sup>, Qiang Hu<sup>5</sup>, Danxiang Han<sup>3\*</sup> and EonSeon Jin<sup>1\*</sup>**

<sup>1</sup>Department of Life Science, Research Institute for Natural Science, Hanyang University, Seoul, 133-791, South Korea

<sup>2</sup>Department of Bioscience and Biotechnology, Konkuk University, Seoul, 143-701, South Korea

<sup>3</sup>College of Technology and Innovation, Arizona State University, Mesa, Arizona 85212, USA

<sup>4</sup>Department of Biotechnology, Institute of Industrial Biotechnology, Inha University, Incheon, 402-751, South Korea

<sup>5</sup>Center for Microalgal Biotechnology and Biofuels, Institute of Hydrobiology, Chinese Academy of Sciences, Wuhan, Hubei 430072, China

+Both authors contributed equally to this work

**\* Corresponding authors:**

**EonSeon Jin: Tel: +82-2-2220-2561; fax: 82-2-2299-2561; e-mail: esjin@hanyang.ac.kr**

**Danxiang Han: Tel: +1-480-727-5661; email: Danxiang.Han@asu.edu**

Fig. 5. Kyoto Encyclopedia of Genes and Genomes (KEGG) pathway analysis of *H. pluvialis* transcripts.

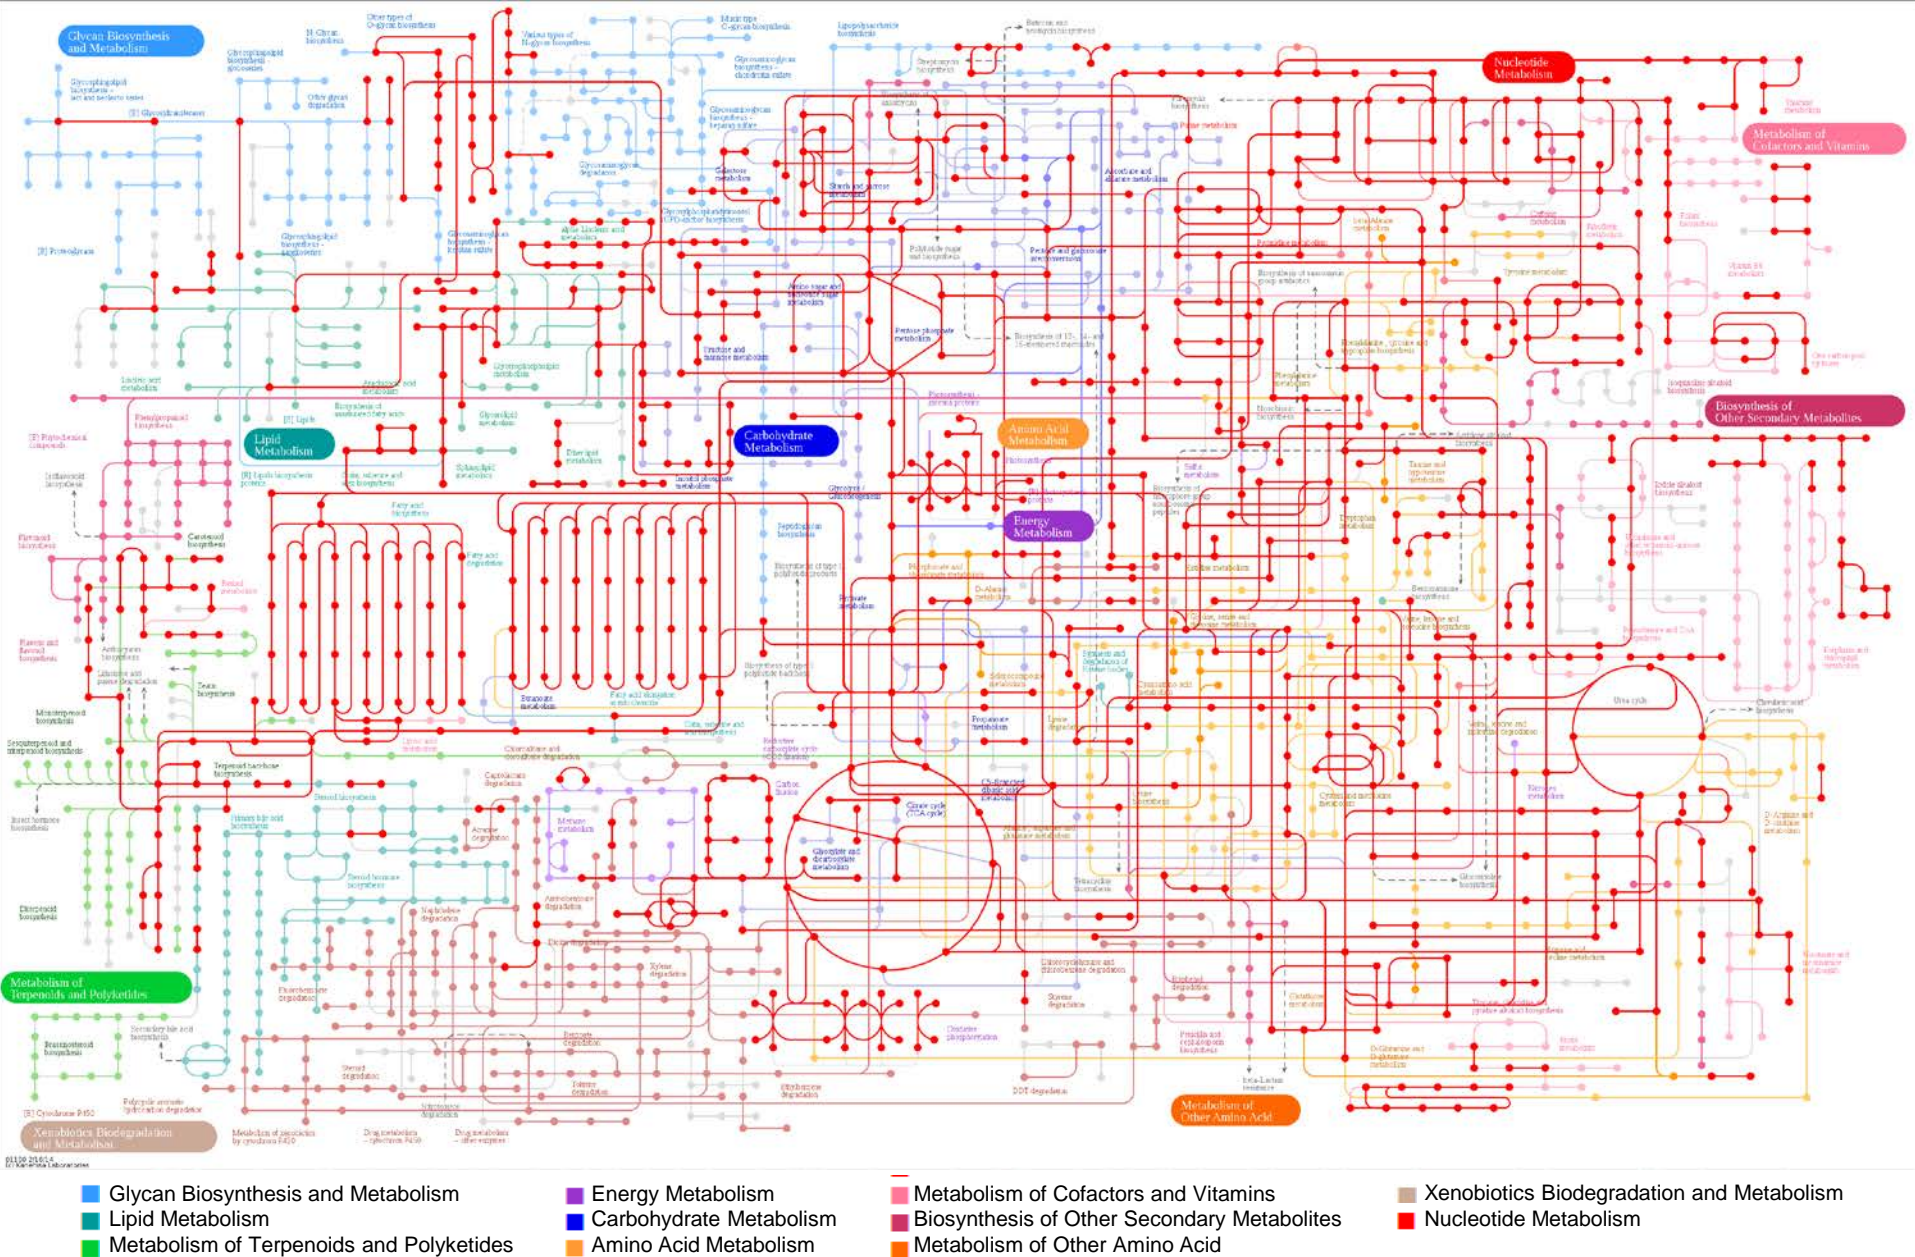

Fig. S6. KEGG pathway analysis of *H. pluvialis*. Macrozooids (A)

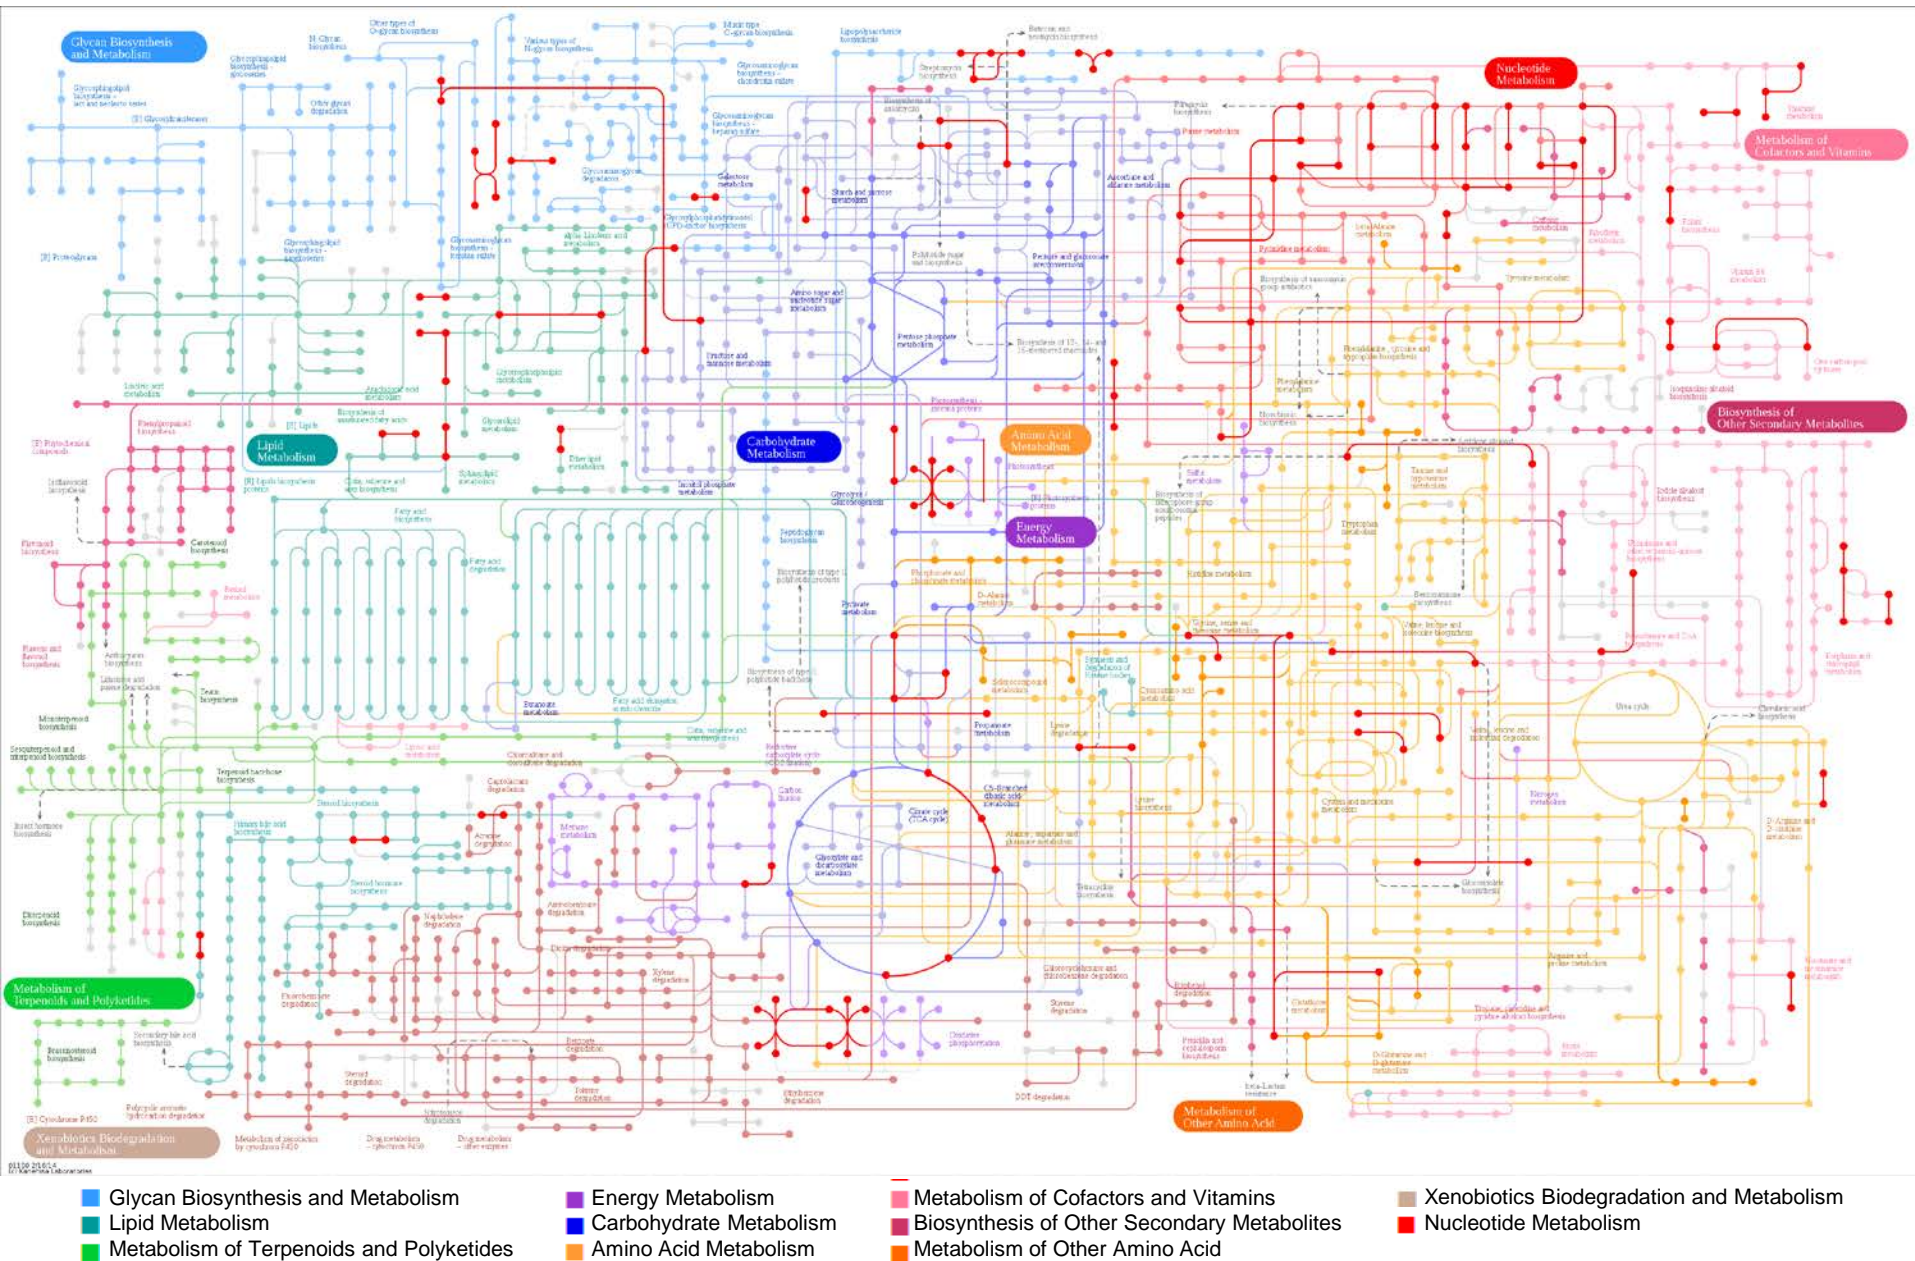

Fig. S6. KEGG pathway analysis of *H. pluvialis*. Cysts (B)

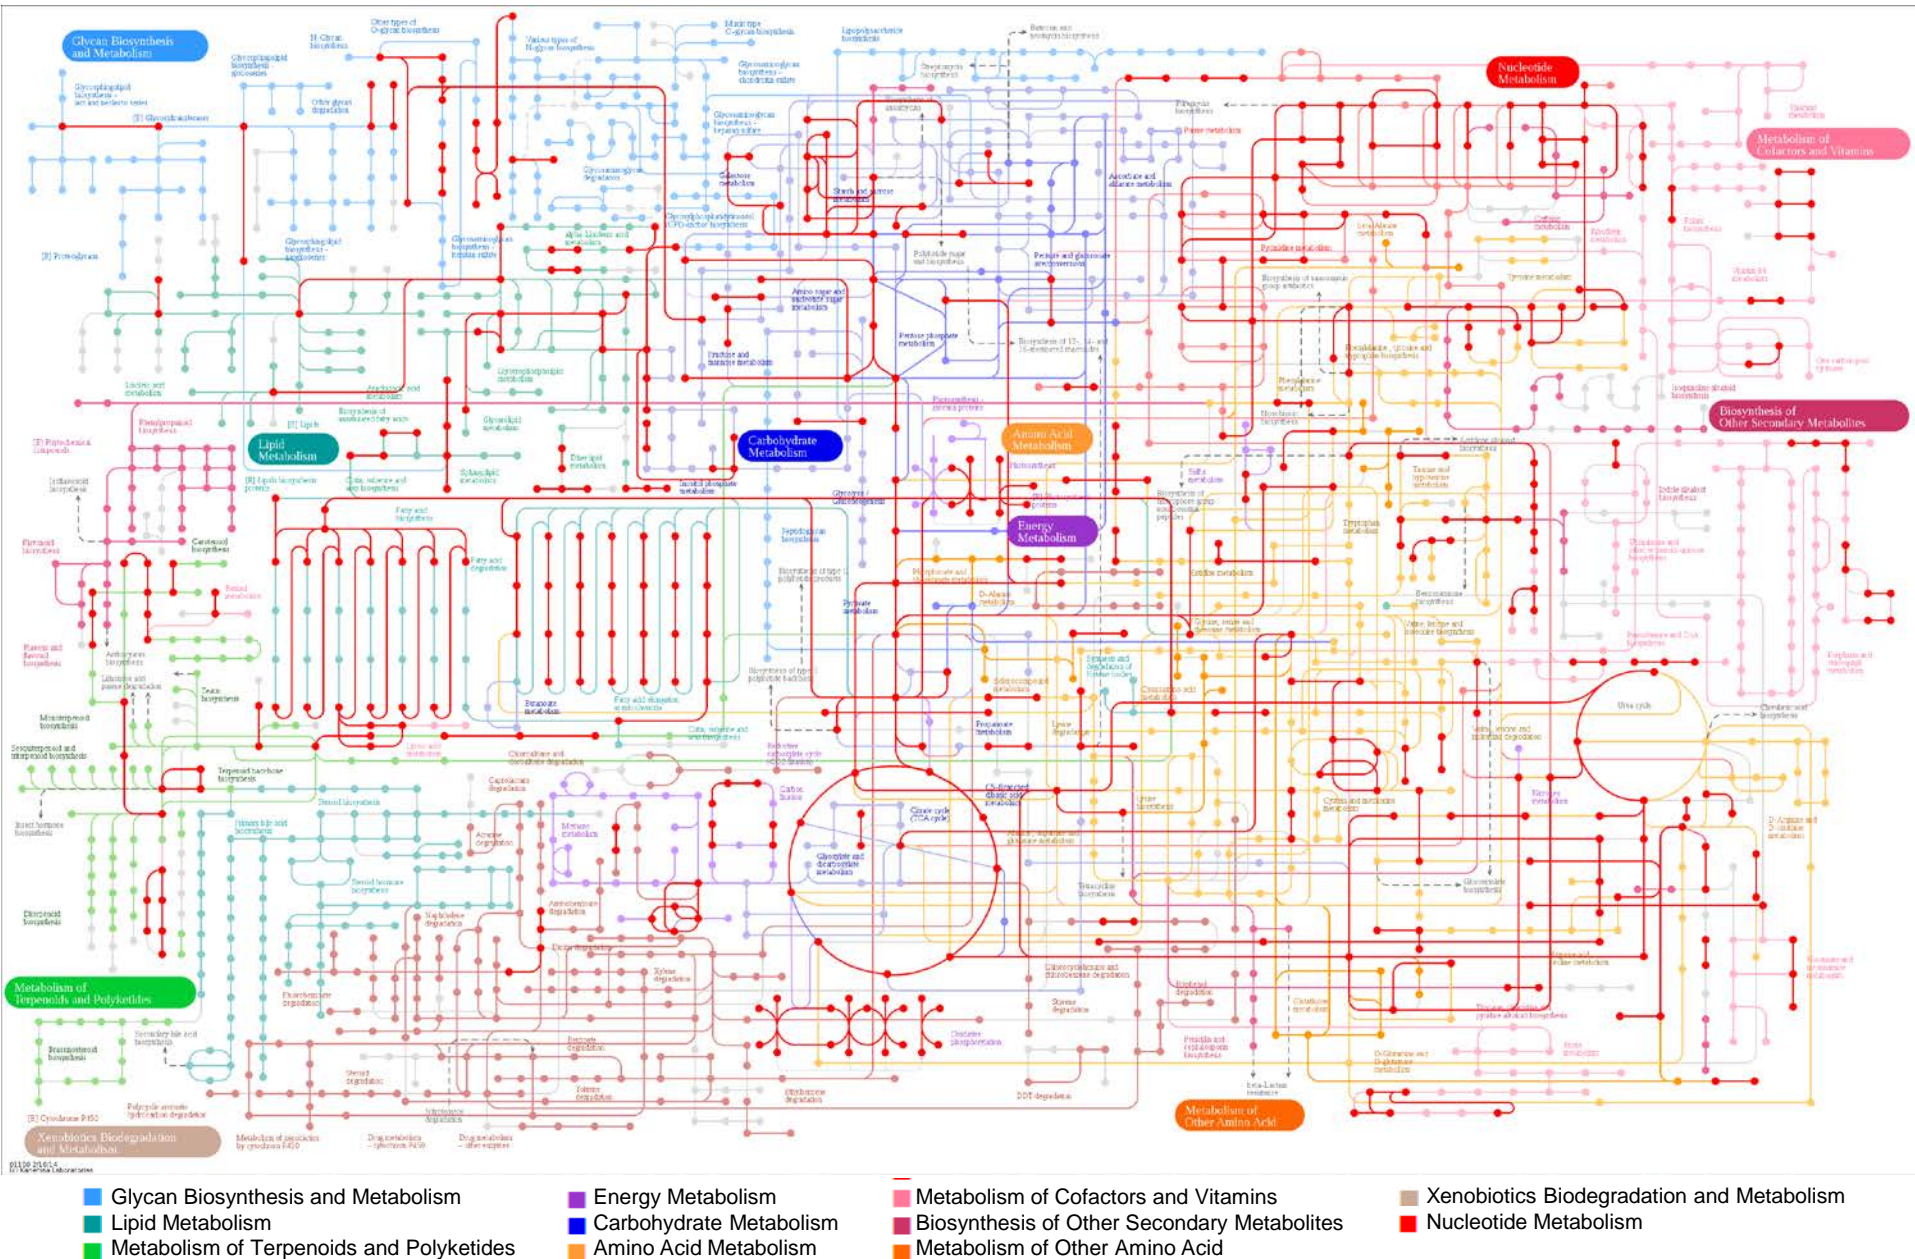

Supplement: supp_eru206_jexbot119974_file002.pdf [file supp_eru206_jexbot119974_file002.pdf]
